# Supplementary material
Source: PubMed Central journal article supplement (PMC5817616)
Supplement: jamadermatol-153-529-s002.pdf [file jamadermatol-153-529-s002.pdf]

## Supplementary Online Content

Kim KH, Choi TH, Choi Y, et al. Comparison of Efficacy and Safety Between Propranolol and Steroid for Infantile Hemangioma: A Randomized Clinical Trial. Published online April 19, 2017. *JAMA Dermatology*. doi:10.1001/jamadermatol.2017.0250

**eTable 1 through eTable 32.** Various data reports

**eFigure 1.** Secondary efficacy variables

**eReferences.**

This supplementary material has been provided by the authors to give readers additional information about their work.

## Supplements

### Comparison of Efficacy and Safety between Propranolol and Steroid for Infantile Hemangioma: A Randomized Clinical Trial

Kyu Han Kim, MD, PhD,<sup>1,2,3,\*</sup> and Tae Hyun Choi, MD, PhD,<sup>4,\*</sup> Yunhee Choi, PhD,<sup>5</sup> Young Woon Park, MD,<sup>1</sup>  
Ki Yong Hong, MD, PhD,<sup>6</sup> Dong Young Kim, MD,<sup>1,2,3</sup> Yun Seon Choe, MD,<sup>1</sup> Hyunjung Lee, RN,<sup>4</sup> Jung-Eun  
Cheon, MD, PhD,<sup>7</sup> Jung-Bin Park, BS,<sup>8</sup> Kyung Duk Park, MD, PhD,<sup>9</sup> Hyoung Jin Kang, MD, PhD,<sup>9</sup>  
Hee Young Shin, MD, PhD,<sup>9</sup> Jae Hoon Jeong, MD, PhD,<sup>10</sup>

<sup>1</sup>Department of Dermatology, Seoul National University College of Medicine, Seoul, Republic of Korea,

<sup>2</sup>Institute of Human Environment Interface Biology, Seoul National University Medical Research Center, Seoul,

Republic of Korea, <sup>3</sup>Laboratory of Cutaneous Aging and Hair Research, Biomedical Research Institute, Seoul

National University Hospital, Seoul, Republic of Korea, <sup>4</sup>Department of Plastic and Reconstructive Surgery,

Institute of Human-Environment Interface Biology, Seoul National University College of Medicine, Seoul,

Republic of Korea, <sup>5</sup>Devision of Medical Statistics, Medical Research Collaborating Center, Seoul National

University College of Medicine, Seoul National University Hospital, Seoul, Republic of Korea, <sup>6</sup>Department of

Plastic and Reconstructive Surgery, Seoul National University Hospital, Seoul, Republic of Korea, <sup>7</sup>Department

of Radiology, Seoul National University College of Medicine, Seoul, Republic of Korea, <sup>8</sup>Department of

Medicine, Seoul National University School of Medicine (Master Course), Seoul, Republic of Korea,

<sup>9</sup>Department of Pediatrics, Cancer Research Institute, Seoul National University College of Medicine, Seoul

National University Children's Hospital, Seoul, Republic of Korea, <sup>10</sup>Department of Plastic and Reconstructive

Surgery, Seoul National University Bundang Hospital, Gyeonggi, Republic of Korea

\*Kyu Han Kim and Tae Hyun Choi contributed equally to this article as first authors.

## Contents

|                                                                          |    |
|--------------------------------------------------------------------------|----|
| 1. Objectives and Trial Design-----                                      | 4  |
| 1.1 Objective -----                                                      | 4  |
| 1.2 Trial Design -----                                                   | 4  |
| 1.3 Eligibility Criteria -----                                           | 4  |
| 1.4 Sample Size Determination -----                                      | 5  |
| 1.5 Medication Schedule -----                                            | 7  |
| 2. Basic Settings for Statistical Analysis -----                         | 8  |
| 2.1 General Principle of Results Analysis -----                          | 8  |
| 2.2 Missing Value Adjustment -----                                       | 9  |
| 2.3 Participation Status and Violation of Trial Protocol -----           | 9  |
| 2.4 Demographic Analysis and Baseline Inspection Results Analysis -----  | 9  |
| 2.5 Analysis of Efficacy Variables -----                                 | 9  |
| 2.6 Safety Analysis -----                                                | 12 |
| 3. Participants -----                                                    | 13 |
| 3.1 Participation Status -----                                           | 13 |
| 3.2 Demographic Analysis and Baseline Inspection Results Analysis -----  | 14 |
| 3.2.1 Demographic Analysis -----                                         | 14 |
| 3.2.2 Baseline Inspection Result Analysis -----                          | 16 |
| 3.2.3 Baseline Hemangioma Inspection Result Analysis -----               | 25 |
| 3.2.4 Concomitant Drug -----                                             | 31 |
| 4. Results of Efficacy Evaluation -----                                  | 34 |
| 4.1 Primary Efficacy Evaluation -----                                    | 34 |
| 4.1.1. Missing Value Adjustment by Applying Multiple Imputation -----    | 35 |
| 4.1.2. Missing Value Adjustment by Replacement with “Non-reaction” ----- | 36 |
| 4.1.3. Missing Value Adjustment by Replacement with “Reaction” -----     | 37 |
| 4.1.4. Primary Efficacy Evaluation (PP population) -----                 | 38 |

|                                                               |    |
|---------------------------------------------------------------|----|
| 4.2 Secondary Efficacy Evaluation                             | 39 |
| 4.2.1. Size (Volume) of Hemangioma                            | 39 |
| 4.2.2. Size (surface area) of Hemangioma                      | 40 |
| 4.2.3. Color of Hemangioma                                    | 43 |
| 4.2.4. Re-epithelization                                      | 44 |
| 4.2.5 Ulceration                                              | 46 |
| 4.2.6. The Time of Reaching Proliferative Stop and Regression | 53 |
| 4.2.7. Compliance                                             | 55 |
| 5. Results of Safety Evaluation                               | 57 |
| 5.1 Complications                                             | 57 |
| 5.2 Adverse Reactions                                         | 61 |
| 5.3. Vital Sign and Glucose level (BST)                       | 66 |
| 6. Conclusion                                                 | 70 |
| 6.1 Efficacy Evaluation                                       | 72 |
| 6.1.1. Primary Efficacy Evaluation                            | 72 |
| 6.1.2. Secondary Efficacy Evaluation                          | 73 |
| 6.2 Safety Evaluation                                         | 75 |
| 7. References                                                 | 76 |

## 1. Objectives and Trial Design

### 1.1. Objective

- To survey the efficacy and safety of propranolol as an initial treatment for infantile hemangioma by randomized controlled trial.

### 1.2. Trial Design

- Single institution, randomized controlled non-inferiority trial

### 1.3. Eligibility Criteria

**eTable 1. Inclusion and exclusion criteria**

---

**Inclusion criteria**

Hemangioma patient (0-9 months old)  
No prior treatment  
10 -20% volume increase in 2-4 weeks  
Hemangioma that caused organ function  
Hemangioma that will cause an aesthetic problem  
(First and second conditions must be met, and at least one of the last 3 conditions must be met)

**Exclusion criteria**

Cardiovascular disease (impossible to use propranolol)  
Drug adverse reaction or allergy history (propranolol, steroid)  
Bradycardia, atrioventricular block, atrial block  
Cardiogenic shock  
Right heart failure (pulmonary hypertension)  
Congestive heart failure  
Hypotension  
Peripheral nerve disease (moderate)  
Angina  
Hormone deficiency patient  
Pulmonary disease (asthma)  
Diabetic ketoacidosis  
Laser treatment history  
Infectious disease  
Herpes, zoster, chickenpox  
Infectious disease, systemic fungal infection without effective antibiotics

---

#### 1.4. Sample Size Determination

Patients diagnosed with hemangioma, agreed voluntarily to participate and signed informed consent prior to study entry are the target of the study. Hemangioma volume was measured using magnetic resonance imaging (MRI). In the case where the guardian of a patient refused the use of MRI, we performed an ultrasound examination.

In this study, the steroid group is set as the control group to evaluate the non-inferiority of the experimental group compared to the control group. The treatment response after 16 weeks of medication is used for the therapeutic index. To calculate the sample size for this study, we used the following assumptions:

- level of significance = 0.05( $\alpha=0.05$ )
- ratio, experimental group : control group = 1:1( $\lambda=1$ )
- Type II error ( $\beta$ ) is 0.2 to keep the power of the test at 80%.

In this study, the experimental group's primary evaluation variable (Pt) is compared with the control group's primary evaluation variable to test for non-inferiority. Our hypotheses is as follows:

- H0: 16 weeks after injecting propranolol, the treatment response(Pt) is inferior compared to the treatment response of steroid injection(Pc)
- H1: 16 weeks after injecting propranolol, the treatment response (Pt) is non-inferior to the treatment response of steroid treatment(Pc)

According to previous studies, propranolol's treatment response (Pt) is assumed to be 85%, and Steroid's treatment response(Pc) is assumed to be 65%.<sup>1-4</sup> In addition, assuming that the propranolol on steroid response rate does not fall by greater than 20%, the non-inferiority margin is selected to be -20%.

The sample size's calculation formula and results is as follows:

$$n_c = \frac{\left( z_\alpha \sqrt{pq} \cdot (\lambda + 1)/\lambda + z_\beta \sqrt{p_c q_c + p_t q_t/\lambda} \right)^2}{(\epsilon - (p_c - p_t))^2}$$

$n_c$  = Adequate sample size

$Z_\alpha$  = Z-score of standard normal distribution for the significance level (type I error) (Significance level 5%:

$Z_\alpha=1.645$ )

$Z_{\beta}$  = Z-score of standard normal distribution for power (power 80%, one-tailed:  $Z_{\beta}=0.840$ )

$$\bar{p} = (P_t + P_c)/2$$

$$\bar{q} = 1 - \bar{p}$$

$$q_c = 1 - P_c$$

$$q_t = 1 - P_t$$

Using the above assumptions, the sample size for each group (n) is calculated to be 15 people. Assuming a 10% quit rate, the total target participant number is calculated to be 17 people per group, and 34 people in total.

## 1.5 Medication schedule

**eTable 2. Medication schedule**

| Schedule                            | Baseline | Treatment           |                        |                         |                         |                          |                          |                          |
|-------------------------------------|----------|---------------------|------------------------|-------------------------|-------------------------|--------------------------|--------------------------|--------------------------|
|                                     |          | Visit 1<br>0-3 days | Visit 2<br>1±1<br>week | Visit 3<br>4±1<br>weeks | Visit 4<br>8±1<br>weeks | Visit 5<br>12±1<br>weeks | Visit 6<br>16±1<br>weeks | Visit 7<br>20±1<br>weeks |
| Experimental group<br>(Propranolol) | MRI      | ↓                   | ↓                      | ↓                       | ↓                       | ↓                        | ↓                        | ↓                        |
|                                     |          | Induction           |                        |                         |                         |                          | MRI Tapering start       |                          |
| Control group<br>(Steroid)          | MRI      |                     |                        |                         |                         |                          | MRI Tapering start       |                          |

MRI denotes magnetic resonance imaging.

**eTable 3. Drug induction and tapering schedule**

### A. Induction schedule

| Day 1    |                                                   |                                                   | Day 2                                             |                                                   |                                           | Day 3                                     |                |
|----------|---------------------------------------------------|---------------------------------------------------|---------------------------------------------------|---------------------------------------------------|-------------------------------------------|-------------------------------------------|----------------|
| Morning  | Noon                                              | Evening                                           | Morning                                           | Noon                                              | Evening                                   | Morning                                   | Noon           |
| Admitted | 0.5<br>mg/kg/day<br>( $\frac{1}{4}$ of<br>dosage) | 0.5<br>mg/kg/day<br>( $\frac{1}{4}$ of<br>dosage) | 1.0<br>mg/kg/day<br>( $\frac{1}{2}$ of<br>dosage) | 1.0<br>mg/kg/day<br>( $\frac{1}{2}$ of<br>dosage) | 2.0<br>mg/kg/day<br>(Treatment<br>dosage) | 2.0<br>mg/kg/day<br>(Treatment<br>dosage) | Discharge<br>d |

### B. Tapering schedule

| Week 16                                   | Week 17                                           | Week 18                                           | Week 19                                           | Week 20                      |
|-------------------------------------------|---------------------------------------------------|---------------------------------------------------|---------------------------------------------------|------------------------------|
| 2.0<br>mg/kg/day<br>(Treatment<br>dosage) | 1.5<br>mg/kg/day<br>( $\frac{3}{4}$ of<br>dosage) | 1.0<br>mg/kg/day<br>( $\frac{1}{2}$ of<br>dosage) | 0.5<br>mg/kg/day<br>( $\frac{1}{4}$ of<br>dosage) | 0.0<br>mg/kg/day<br>(Finish) |



## **2. Basic Setting for Statistical Analysis**

### **2.1 General Principle of Result Analysis**

The standard level of significance ( $\alpha$ ) was set as 0.05 and a two-tailed test was used in this clinical trial unless otherwise indicated. At each time point, the mean, standard deviation, median, minimum and maximum values were calculated for continuous data and the frequency and percentage was shown for categorical data.

Groups of participants for statistical analysis are as follows.

#### **2.1.1. Per Protocol Population (Per Protocol Set, PP Population)**

“Per protocol population” is defined as the group of participants who adhere to the protocol and complete the trial. However, those whose efficacy variables cannot be measured will be excluded from the “per protocol population”

#### **2.1.2. Intention to Treat Population (Full Analysis Set, Intent-to-Treatment Population)**

“Intention to treat population (ITT)” is defined as the group of participants who are randomly assigned. However, if after assignment a participant does not receive a drug injection or if an evaluation is never made after a drug injection, he or she will be excluded from the “intention to treat population”.

#### **2.1.3. Safety Population**

“Safety population” refers to all participants who have at least one safety assessment performed after assignment.

#### **2.1.4. Subject of Analysis for Efficacy and Safety**

For efficacy evaluation, the intention to treat population (ITT population) is the main subject of analysis for the primary efficacy variable and the per-protocol population (PP population) is the secondary subject of analysis. For safety evaluation, the safety population is the subject of analysis.

## **2.2. Missing Value Adjustment**

If primary efficacy was not evaluated due to refusal of MRI scanning or ultrasound examination, missing values are replaced by applying multiple imputation (MI). The MI method was used to predict the “Reaction” or “Non-reaction” using some of secondary efficacy variables such as size (area), proliferative stop time point, regression time point, color, ulceration size, and presence of re-epithelization. In addition, data with replaced missing values in primary efficacy is analyzed to assess the effect of missing value.

## **2.3. Participation Status and Violation of Trial Protocol**

The diagram of participation status, the reasons for withdrawal, and distribution of protocol violation were reported.

## **2.4. Demographic Analysis and Baseline Inspection Results Analysis**

To evaluate for differences in demographics, baseline inspections (age, sex, weight, height, etc.), and baseline hemangioma inspection results between the two groups, the t-test or Wilcoxon rank sum test (depending on normality test results) is conducted for continuous data and the Chi-square test or Fisher’s exact test (depending on frequency distribution) is used for binary data.

## **2.5. Analysis of Efficacy Variables**

The primary efficacy variable is hemangioma volume measured by a MRI scan or ultrasound examination (when the patient or guardian refused a MRI scan for a number of reasons). The secondary efficacy variable is hemangioma size (area), hemangioma color, ulceration, presence of re-epithelization, proliferative stop point, regression point, and compliance.

**eTable 4. Efficacy and safety assessment**<sup>5-11</sup>

---

|                                     |                                                                                                                                                                                       |
|-------------------------------------|---------------------------------------------------------------------------------------------------------------------------------------------------------------------------------------|
| <b>Primary efficacy variable</b>    |                                                                                                                                                                                       |
| Volume (Treatment Response)         | Hemangioma volume measured (mm <sup>3</sup> ) through MRI scan or ultrasound examination (when patient or guardian refused MRI scan)                                                  |
| <b>Secondary efficacy variables</b> |                                                                                                                                                                                       |
| Volume (Change in Volume)           | Hemangioma volume measured (mm <sup>3</sup> ) through MRI scan or ultrasound examination (when patient or guardian refused MRI scan)                                                  |
| The surface area                    | Hemangioma's major and minor axes measured in mm                                                                                                                                      |
| Color                               | Hemangioma's color categorized as red/purple/blue/gray/apricot (Evaluated as 1, 2, 3, 4, 5 points respectively)                                                                       |
| Ulceration Size                     | Ulceration's major and minor axes measured in mm to check whether surface integrity is maintained. In the case of a bleeding history, it was determined that an ulceration is present |
| Re-epithelization                   | If the surface no longer showed any exudates, it was evaluated as a re-epithelization (evaluated as yes/no)                                                                           |
| Exponential Stage Suspension Period | Recorded time of when size (area) did not increase after treatment or decreased by less than 25%,                                                                                     |
| Regression Period                   | Recorded time of when size (area) decreased by more than 25% after treatment started                                                                                                  |
| Compliance                          | Length of medication or number of outpatient visits                                                                                                                                   |
| <b>Safety variables</b>             |                                                                                                                                                                                       |
| Decreased Heart Rate                | If heart rate is below 70% of normal heart rate or if symptoms of decreased heart rate is observed                                                                                    |
| Low Blood Pressure                  | If systolic blood pressure decreased by more than 25% of initial blood pressure                                                                                                       |
| Hypoglycemia                        | If blood sugar is decreased to less than 50mg/dl, if fatigue or other symptoms of hypoglycemia are observed                                                                           |
| Trouble breathing                   | If symptoms of bronchoconstriction are observed or wheezing is heard through stethoscope                                                                                              |
| Facial edema                        | If temporal region and cheeks expand and a double chin appears                                                                                                                        |
| Gastroesophageal Reflux             | If patient vomits more than 4 times a day                                                                                                                                             |
| Hypertension                        | If blood pressure increases by more than 25% compared to initial blood pressure                                                                                                       |
| Growth disability                   | If weight and height falls below 5 percentile or no growth is observed during four-month observation period                                                                           |
| Adverse reaction                    | If an adverse reaction such as secondary reaction, interaction, immunologic drug reaction, intolerance, specific reaction, allergies, etc. are observed                               |

---

### **2.5.1. Primary Efficacy Evaluation Variable**

The primary efficacy variable is response of treatment using hemangioma volume measured by a MRI scan or ultrasound examination (when the patient or guardian refused a MRI scan for a number of reasons).

The response of treatment is classified as follows:

- Reaction is defined as proliferative stop or regression
  - Proliferative stop is defined as no further increase in the size (by volume) after treatment began or a size reduction of less than 25%.
  - Regression is defined as a size reduction of more than 25% compared to original size after treatment began.
- Non-reaction means increase of the lesion.
  - Increase is defined as the size (by volume) at primary efficacy evaluation point being greater than the size measured when treatment started.

To show that the experimental group's treatment response rate is non-inferior to the control group's treatment response rate, we obtained a 95% confidence interval for  $P_t - P_c$  (experimental group's treatment response rate – control group's treatment response rate). If the lower limit of the confidence interval is greater than -10%, it can be said that the experimental group's treatment response is non-inferior. In addition, differences in treatment response rate between the two groups are checked using the Chi-square test and Fisher's exact test.

### **2.5.2 Secondary Efficacy Evaluation Variable**

In this study, the secondary efficacy variable is hemangioma size (area), hemangioma color, presence of ulceration and ulceration size, presence of re-epithelization, proliferative stop point, regression point, and compliance. At each time point, the mean, standard deviation, median, minimum and maximum values are calculated for continuous data and frequency and percentage is presented for categorical data. The variables are evaluated as follow:

- Hemangioma size (area), ulceration size: A mixed model or generalized estimating equation (GEE) is used

to determine if there are any differences in hemangioma size (area) and ulceration size depending on time point, or differences between groups, or group patterns across different time points.

- Hemangioma color: A model using GEE is used to evaluate changes over time in the incidence of hemangioma by color or differences between groups.
- Presence of ulceration and ulceration size, Presence of re-epithelization ulceration: A model using GEE is used to evaluate changes over time in the incidence of ulceration and re-epithelization or differences between groups.
- Proliferative stop point, regression point: The Kaplan-Meier method is used to estimate survival time and a log-rank test is used to analyze differences in survival functions. After steroid or propranolol is injected, the median value and range of proliferative stop or regression time point is presented and the frequency and percentage is calculated for the participant who stopped proliferating or experienced regression. In addition, the log-rank test is used to compare the two groups.
- Compliance: Using descriptive statistics such as means and standard deviations for each visit, the independent t-test or Wilcoxon's rank sum test is used to determine any differences in compliance between the two groups.

## **2.6. Safety Analysis**

The safety population is the subject of analysis. During the duration of the clinical test, the number of participants who experienced at least one adverse reaction and percentage is recorded for each adverse reaction and separated by group. Information regarding extent of adverse reaction, result, causality, and related measures is also arranged by group. Statistical methods such as Fisher's exact test were used to for comparative analysis between groups. In addition, for each group the side effect category and rate of incidence is calculated. In the case of vital signs, glucose level by blood sugar test (BST), and safety evaluation categories (decreased heart rate, low blood sugar, low blood pressure, etc.), which were measured one hour after injection, descriptive statistics were used to summarize the data. For continuous data, the t-test or Wilcoxon rank sum test is conducted depending on normality test results. For binary data, depending on frequency distribution the Chi-square test or Fisher's exact test is used to evaluate differences between injection groups.

### 3. Participants

#### 3.1. Participation Status

The participation status (ITT group, PP group, Safety analysis group) is presented as follows (Figure 1) and reasons for quitting the trial are presented as follows (eTable 5).

A total of 34 patients agreed and registered in this trial. The patients were randomly assigned to either the propranolol group (17 patients) or steroid group (17 patients). Two guardians withdrew consent in the steroid group and one patient in the propranolol did not complete the efficiency test. The efficiency evaluation was conducted in the PP analysis group, which includes 30 target participants (propranolol group: steroid group = 16:14). The safety evaluation was conducted in the ITT analysis group, which had a total of 33 patients (propranolol group: steroid group = 17:16).

**eTable 5. Participation status**

|                                               | <b>Total</b> | <b>Propranolol</b> | <b>Steroid</b> |
|-----------------------------------------------|--------------|--------------------|----------------|
| <b>Registered participants, N</b>             | 34           | 17                 | 17             |
| <b>Trial-completed participants, N</b>        | 32           | 17                 | 15             |
| <b>Withdrawal, N</b>                          | 2            | 0                  | 2              |
| 1. Violation of inclusion, exclusion criteria | 0            | 0                  | 0              |
| 2. Withdrawal of consent                      | 2            | 0                  | 2              |
| 3. Drug adverse reaction                      | 0            | 0                  | 0              |
| 4. Non-compliance                             | 0            | 0                  | 0              |
| 5. Discretion of investigator                 | 0            | 0                  | 0              |
| 6. Others                                     | 0            | 0                  | 0              |

### 3.2. Demographic Analysis and Baseline Inspection Results Analysis

To evaluate for differences in demographics, baseline inspections (age, sex, weight, height, etc.) and baseline hemangioma inspection results between the two groups, the t-test or Wilcoxon rank sum test (depending on normality test results) is conducted for continuous data and the Chi-square test or Fisher's exact test (depending on frequency distribution) is used for binary data.

#### 3.2.1. Demographic Analysis

Demographic of the patients are shown in eTable 6. In terms of demographics for the ITT group, the mean age for the 17 participants assigned to the propranolol group was 3.18 months, mean weight was 6.45kg, and mean height was 61.75cm. For the 17 participants assigned to the steroid group, the mean age was 2.65 months, mean weight was 6.02kg, and mean height was 60.51cm. In the propranolol group, 7 of the participants were male (41.18%), and in the steroid group, 8 were male (47.06%). All demographics were not statistically significant at the 5% level, thus it cannot be said that there was any statistical difference between the two groups.

**eTable 6. Demographic characteristics**

|                    | <b>Propranolol<br/>(N=17)</b> | <b>Steroid<br/>(N=17)</b> | <b>P-value</b> |
|--------------------|-------------------------------|---------------------------|----------------|
| <b>Age (month)</b> |                               |                           |                |
| N                  | 17                            | 17                        | 0.4835*        |
| Mean±S.D.          | 3.18±2.21                     | 2.65±1.97                 |                |
| Median[Min, Max]   | 3[0,8]                        | 2[0,8]                    |                |
| <b>Sex, N(%)</b>   |                               |                           |                |
| - Male             | 7 (41.18)                     | 8 (47.06)                 | 0.7298†        |
| - Female           | 10 (58.82)                    | 9 (52.94)                 |                |
| <b>Weight (kg)</b> |                               |                           |                |
| N                  | 17                            | 17                        | 0.4752‡        |
| Mean±S.D.          | 6.45±1.73                     | 6.02±1.68                 |                |
| Median[Min, Max]   | 6.6[3.1,9]                    | 6[3.4,8.3]                |                |
| <b>Height (cm)</b> |                               |                           |                |
| N                  | 17                            | 17                        | 0.5491‡        |
| Mean±S.D.          | 61.75±6.05                    | 60.51±5.96                |                |
| Median[Min, Max]   | 63.1[49.2,69]                 | 61.5[50.1,69]             |                |

Plus-minus values are mean ± SD. There were no significant differences between two groups unless otherwise

indicated. SD denotes standard deviation.

\* Wilcoxon Rank Sum test, † Chi-square test, ‡ Independent T-test

eTable 7 describes baseline vital sign of patients. It was found that there was no statistically significant difference in vital signs (SBP, DBP, heart rate, respiratory rate, and body temperature) between the two groups (P-value > 0.05)

**eTable 7. Baseline vital sign**

|                                | <b>Propranolol<br/>(N=17)</b> | <b>Steroid<br/>(N=17)</b> | <b>P-value</b> |
|--------------------------------|-------------------------------|---------------------------|----------------|
| <b>SBP (mmHG)</b>              |                               |                           |                |
| N                              | 17                            | 17                        | 0.3980*        |
| Mean±S.D.                      | 94.24±12.26                   | 91.12±10.04               |                |
| Median[Min, Max]               | 88[80,112]                    | 91[76,108]                |                |
| <b>DBP (mmHG)</b>              |                               |                           |                |
| N                              | 17                            | 17                        | 0.8367‡        |
| Mean±S.D.                      | 49.82±10.76                   | 50.59±10.69               |                |
| Median[Min, Max]               | 45[35,72]                     | 50[35,68]                 |                |
| <b>Heart rate (/min)</b>       |                               |                           |                |
| N                              | 17                            | 17                        | 0.1119*        |
| Mean±S.D.                      | 131.59±14.27                  | 138.59±13.54              |                |
| Median[Min, Max]               | 128[109,167]                  | 140[118,160]              |                |
| <b>Respiratory rate (/min)</b> |                               |                           |                |
| N                              | 17                            | 17                        | 0.8576*        |
| Mean±S.D.                      | 35.76±2.63                    | 36.12±3.77                |                |
| Median[Min, Max]               | 36[30,40]                     | 36[32,44]                 |                |
| <b>Body temperature (/min)</b> |                               |                           |                |
| N                              | 17                            | 17                        | 0.7960‡        |
| Mean±S.D.                      | 36.89±0.41                    | 36.93±0.38                |                |
| Median[Min, Max]               | 37[36.1,37.5]                 | 36.9[36.3,37.5]           |                |

\* Wilcoxon Rank Sum test, ‡ Independent T-test

SBP denotes systolic blood pressure, DBP diastolic blood pressure, SD standard deviation.



### 3.2.2. Baseline Inspection Result Analysis

Baseline inspection results of two groups are shown in eTable 8 and eTable 9. No abnormalities were found in the chest radiograph image, electrocardiograph, cardiac inspection, and echocardiograph results of any of the subjects, thus there was no statistical difference between the two groups (P-value > 0.05).

**eTable 8. Chest X-ray, EKG, cardiac inspection and echocardiogram of patients**

| Baseline inspection                          | Propranolol<br>(N=17) | Steroid<br>(N=17) | P-value |
|----------------------------------------------|-----------------------|-------------------|---------|
| <b>Chest X-ray</b>                           |                       |                   |         |
| Normal                                       | 16 (94.12)            | 16 (94.12)        | 1.0000§ |
| Abnormal NCS                                 | 1 (5.88)              | 1 (5.88)          |         |
| Abnormal CS                                  | 0 (0)                 | 0 (0)             |         |
| <b>EKG</b>                                   |                       |                   |         |
| Normal                                       | 10 (58.82)            | 8 (47.06)         | 0.4920† |
| Abnormal NCS                                 | 7 (41.18)             | 9 (52.94)         |         |
| Abnormal CS                                  | 0 (0)                 | 0 (0)             |         |
| <b>Cardiac inspection and Echocardiogram</b> |                       |                   |         |
| Normal                                       | 12 (70.59)            | 10 (58.82)        | 0.4729† |
| Abnormal NCS                                 | 5 (29.41)             | 7 (41.18)         |         |
| Abnormal CS                                  | 0 (0)                 | 0 (0)             |         |

† Chi-square test, § Fisher's exact test,

NCS denotes not clinically significant, CS clinically significant, EKG electrocardiograph.

In the steroid group, for the blood chemistry categories total bilirubin, alkaline phosphatase and potassium, several subjects had abnormal values: 3 for total bilirubin, 2 for alkaline phosphatase, and 2 for potassium. No subjects showed abnormal values for any of the other inspections.

In the propranolol group, none of the subjects showed abnormal values for any of the test categories.

Excluding alkaline phosphatase, we found no significant difference in blood test or urinalysis results at the 5% level. In the case of alkaline phosphatase, the propranolol group mean was 257.18 IU/L, and the steroid group mean was 315.82 IU/L. Although the steroid group had a higher mean, there was no significant difference.

**Table 9. Complete blood count, blood chemistry and urinalysis of patients**

|                                             |                  | <b>Propranolol<br/>(N=17)</b> | <b>Steroid<br/>(N=17)</b> | <b>P-value</b> |
|---------------------------------------------|------------------|-------------------------------|---------------------------|----------------|
| <b>Complete Blood Count</b>                 |                  |                               |                           |                |
| <b>White blood cell (10<sup>3</sup>/μℓ)</b> | N                | 17                            | 17                        | 0.9451*        |
|                                             | Mean±S.D.        | 9.38±2.89                     | 9.34±2.9                  |                |
|                                             | Median[Min, Max] | 9.03[5.1,17.72]               | 8.27[5.76,18.61]          |                |
|                                             | Normal           | 12 (70.59)                    | 12 (70.59)                | 1.0000†        |
|                                             | Abnormal NCS     | 5 (29.41)                     | 5 (29.41)                 |                |
|                                             | Abnormal CS      | 0 (0)                         | 0 (0)                     |                |
| <b>Red blood cell (10<sup>6</sup>/μℓ)</b>   | N                | 17                            | 17                        | 0.8052‡        |
|                                             | Mean±S.D.        | 3.94±0.59                     | 3.99±0.47                 |                |
|                                             | Median[Min, Max] | 3.87[2.77,4.79]               | 4.07[2.95,4.75]           |                |
|                                             | Normal           | 8 (47.06)                     | 8 (47.06)                 | 1.0000†        |
|                                             | Abnormal NCS     | 9 (52.94)                     | 9 (52.94)                 |                |
|                                             | Abnormal CS      | 0 (0)                         | 0 (0)                     |                |
| <b>Hemoglobin (g/dL)</b>                    | N                | 17                            | 17                        | 0.5218‡        |
|                                             | Mean±S.D.        | 11.2±1.22                     | 11.44±0.88                |                |
|                                             | Median[Min, Max] | 10.9[9.2,13.2]                | 11.5[9.7,12.9]            |                |
|                                             | Normal           | 4 (23.53)                     | 0 (0)                     | 0.1026§        |
|                                             | Abnormal NCS     | 13 (76.47)                    | 17 (100.00)               |                |
|                                             | Abnormal CS      | 0 (0)                         | 0 (0)                     |                |
| <b>Hematocrit (%)</b>                       | N                | 17                            | 17                        | 0.4956‡        |
|                                             | Mean±S.D.        | 32.79±3.56                    | 33.54±2.69                |                |
|                                             | Median[Min, Max] | 32.5[26.9,38.4]               | 33.4[28,37.9]             |                |
|                                             | Normal           | 2 (11.76)                     | 0 (0)                     | 0.4848§        |
|                                             | Abnormal NCS     | 15 (88.24)                    | 17 (100.00)               |                |
|                                             | Abnormal CS      | 0 (0)                         | 0 (0)                     |                |
| <b>Platelet (10<sup>3</sup>/μℓ)</b>         | N                | 17                            | 17                        | 0.0636‡        |
|                                             | Mean±S.D.        | 399.35±128.51                 | 485.47±132.81             |                |
|                                             | Median[Min, Max] | 369[187,715]                  | 460[295,758]              |                |
|                                             | Normal           | 10 (58.82)                    | 5 (29.41)                 | 0.0842†        |
|                                             | Abnormal NCS     | 7 (41.18)                     | 12 (70.59)                |                |
|                                             | Abnormal CS      | 0 (0)                         | 0 (0)                     |                |
| <b>Mean cell volume (fL)</b>                | N                | 17                            | 17                        | 0.9588*        |
|                                             | Mean±S.D.        | 83.84±6.61                    | 84.66±7.23                |                |
|                                             | Median[Min, Max] | 81.6[76.2,97.1]               | 81.8[76.2,98.9]           |                |
|                                             | Normal           | 11 (64.71)                    | 8 (47.06)                 | 0.3001†        |
|                                             | Abnormal NCS     | 6 (35.29)                     | 9 (52.94)                 |                |
|                                             | Abnormal CS      | 0 (0)                         | 0 (0)                     |                |

|                                                         |                  |                 |                 |         |
|---------------------------------------------------------|------------------|-----------------|-----------------|---------|
| <b>Mean corpuscular hemoglobin (Pg)</b>                 | N                | 17              | 17              | 0.9313* |
|                                                         | Mean±S.D.        | 28.69±2.71      | 28.89±2.49      |         |
|                                                         | Median[Min, Max] | 27.7[25.2,34]   | 27.9[26.3,33.5] |         |
|                                                         | Normal           | 11 (64.71)      | 12 (70.59)      | 0.7139† |
|                                                         | Abnormal NCS     | 6 (35.29)       | 5 (29.41)       |         |
|                                                         | Abnormal CS      | 0 (0)           | 0 (0)           |         |
| <b>Mean corpuscular hemoglobin concentration (g/dL)</b> | N                | 17              | 17              | 0.9587* |
|                                                         | Mean±S.D.        | 34.19±0.99      | 34.12±0.73      |         |
|                                                         | Median[Min, Max] | 34.2[31.5,36.5] | 34.4[32.5,35.1] |         |
|                                                         | Normal           | 15 (88.24)      | 17 (100.00)     | 0.4848§ |
|                                                         | Abnormal NCS     | 2 (11.76)       | 0 (0)           |         |
|                                                         | Abnormal CS      | 0 (0)           | 0 (0)           |         |
| <b>Red cell distribution (%)</b>                        | N                | 17              | 17              | 0.0775‡ |
|                                                         | Mean±S.D.        | 13.38±1.15      | 14.19±1.43      |         |
|                                                         | Median[Min, Max] | 13.4[11.6,14.9] | 14[12.1,17.3]   |         |
|                                                         | Normal           | 14 (82.35)      | 10 (58.82)      | 0.1322† |
|                                                         | Abnormal NCS     | 3 (17.65)       | 7 (41.18)       |         |
|                                                         | Abnormal CS      | 0 (0)           | 0 (0)           |         |
| <b>Segmented neutrophil (%)</b>                         | N                | 17              | 17              | 0.1474‡ |
|                                                         | Mean±S.D.        | 16.29±4.88      | 19.58±7.72      |         |
|                                                         | Median[Min, Max] | 16.1[7,24.7]    | 18.3[9,33.5]    |         |
|                                                         | Normal           | 0 (0)           | 0 (0)           | -       |
|                                                         | Abnormal NCS     | 17 (100.00)     | 17 (100.00)     |         |
|                                                         | Abnormal CS      | 0 (0)           | 0 (0)           |         |
| <b>Lymphocyte (%)</b>                                   | N                | 17              | 17              | 0.1106‡ |
|                                                         | Mean±S.D.        | 71.95±6.27      | 67.67±8.73      |         |
|                                                         | Median[Min, Max] | 71[62.4,86]     | 68.9[49.3,82.7] |         |
|                                                         | Normal           | 0 (0)           | 0 (0)           | -       |
|                                                         | Abnormal NCS     | 17 (100.00)     | 17 (100.00)     |         |
|                                                         | Abnormal CS      | 0 (0)           | 0 (0)           |         |
| <b>Monocyte (%)</b>                                     | N                | 17              | 17              | 0.4364‡ |
|                                                         | Mean±S.D.        | 7.38±2.32       | 8.16±3.33       |         |
|                                                         | Median[Min, Max] | 7.2[4,13]       | 8[3,15.5]       |         |
|                                                         | Normal           | 14 (82.35)      | 11 (64.71)      | 0.4384§ |
|                                                         | Abnormal NCS     | 3 (17.65)       | 6 (35.29)       |         |
|                                                         | Abnormal CS      | 0 (0)           | 0 (0)           |         |
| <b>Eosinophil (%)</b>                                   | N                | 17              | 17              | 0.6205‡ |
|                                                         | Mean±S.D.        | 3.59±1.45       | 3.91±2.18       |         |

|                                        |                  |                |                |         |
|----------------------------------------|------------------|----------------|----------------|---------|
|                                        | Median[Min, Max] | 3.4[1,6]       | 3.3[1,8.1]     |         |
|                                        | Normal           | 13 (76.47)     | 12 (70.59)     | -       |
|                                        | Abnormal NCS     | 4 (23.53)      | 5 (29.41)      |         |
|                                        | Abnormal CS      | 0 (0)          | 0 (0)          |         |
| <b>Basophil (%)</b>                    | N                | 17             | 17             | 0.5904* |
|                                        | Mean±S.D.        | 0.31±0.29      | 0.37±0.3       |         |
|                                        | Median[Min, Max] | 0.3[0,1.1]     | 0.3[0,1.1]     |         |
|                                        | Normal           | 17 (100.00)    | 17 (100.00)    | -       |
|                                        | Abnormal NCS     | 0 (0)          | 0 (0)          |         |
|                                        | Abnormal CS      | 0 (0)          | 0 (0)          |         |
| <b>Absolute neutrophil count (/μℓ)</b> | N                | 17             | 17             | 0.2746‡ |
|                                        | Mean±S.D.        | 1520.71±647.23 | 1780.53±713.95 |         |
|                                        | Median[Min, Max] | 1519[632,3012] | 1579[608,2880] |         |
|                                        | Normal           | 6 (35.29)      | 7 (41.18)      | 0.7242† |
|                                        | Abnormal NCS     | 11 (64.71)     | 10 (58.82)     |         |
|                                        | Abnormal CS      | 0 (0)          | 0 (0)          |         |
| <b>Blood Chemistry Test</b>            |                  |                |                |         |
| <b>Calcium (mg/dL)</b>                 | N                | 17             | 17             | 0.6589‡ |
|                                        | Mean±S.D.        | 10.54±0.36     | 10.6±0.4       |         |
|                                        | Median[Min, Max] | 10.6[9.8,11]   | 10.5[10,11.6]  |         |
|                                        | Normal           | 8 (47.06)      | 10 (58.82)     | 0.4920† |
|                                        | Abnormal NCS     | 9 (52.94)      | 7 (41.18)      |         |
|                                        | Abnormal CS      | 0 (0)          | 0 (0)          |         |
| <b>Phosphorus (mg/dL)</b>              | N                | 17             | 17             | 0.4605‡ |
|                                        | Mean±S.D.        | 6.4±0.67       | 6.22±0.75      |         |
|                                        | Median[Min, Max] | 6.4[5.2,7.6]   | 6.4[5.1,7.6]   |         |
|                                        | Normal           | 0 (0)          | 0 (0)          | -       |
|                                        | Abnormal NCS     | 17 (100.00)    | 17 (100.00)    |         |
|                                        | Abnormal CS      | 0 (0)          | 0 (0)          |         |
| <b>Glucose (mg/dL)</b>                 | N                | 17             | 17             | 0.4075* |
|                                        | Mean±S.D.        | 98.06±10.65    | 95.53±10.48    |         |
|                                        | Median[Min, Max] | 94[83,128]     | 93[82,120]     |         |
|                                        | Normal           | 15 (88.24)     | 15 (88.24)     | 1.0000§ |
|                                        | Abnormal NCS     | 2 (11.76)      | 2 (11.76)      |         |
|                                        | Abnormal CS      | 0 (0)          | 0 (0)          |         |
| <b>Blood urea nitrogen (mg/dL)</b>     | N                | 17             | 17             | 0.5305‡ |
|                                        | Mean±S.D.        | 7.47±2.74      | 6.88±2.67      |         |
|                                        | Median[Min, Max] | 7[2,12]        | 7[3,12]        |         |

|                                    |                  |              |                         |         |
|------------------------------------|------------------|--------------|-------------------------|---------|
|                                    | Normal           | 3 (17.65)    | 4 (23.53)               | 1.0000§ |
|                                    | Abnormal NCS     | 14 (82.35)   | 13 (76.47)              |         |
|                                    | Abnormal CS      | 0 (0)        | 0 (0)                   |         |
| <b>Uric acid (mg/dL)</b>           | N                | 17           | 17                      | 0.9725* |
|                                    | Mean±S.D.        | 3±0.78       | 3.02±0.96               |         |
|                                    | Median[Min, Max] | 2.8[1.9,4.4] | 2.9[1.6,5.4]            |         |
|                                    | Normal           | 8 (47.06)    | 6 (35.29)               | 0.4858† |
|                                    | Abnormal NCS     | 9 (52.94)    | 11 (64.71)              |         |
|                                    | Abnormal CS      | 0 (0)        | 0 (0)                   |         |
| <b>Cholesterol (mg/dL)</b>         | N                | 17           | 17                      | 0.5632‡ |
|                                    | Mean±S.D.        | 158.53±28.2  | 164.35±29.89            |         |
|                                    | Median[Min, Max] | 155[107,210] | 164[114,224]            |         |
|                                    | Normal           | 17 (100.00)  | 17 (100.00)             | -       |
|                                    | Abnormal NCS     | 0 (0)        | 0 (0)                   |         |
|                                    | Abnormal CS      | 0 (0)        | 0 (0)                   |         |
| <b>Total protein (g/dL)</b>        | N                | 17           | 17                      | 0.9171‡ |
|                                    | Mean±S.D.        | 6.27±0.41    | 6.25±0.56               |         |
|                                    | Median[Min, Max] | 6.2[5.7,6.9] | 6.3[5.2,7.5]            |         |
|                                    | Normal           | 13 (76.47)   | 12 (70.59)              | 1.0000§ |
|                                    | Abnormal NCS     | 4 (23.53)    | 5 (29.41)               |         |
|                                    | Abnormal CS      | 0 (0)        | 0 (0)                   |         |
| <b>Albumin (g/dL)</b>              | N                | 17           | 17                      | 0.6510* |
|                                    | Mean±S.D.        | 4.28±0.25    | 4.34±0.32               |         |
|                                    | Median[Min, Max] | 4.3[3.9,4.6] | 4.3[3.9,4.9]            |         |
|                                    | Normal           | 17 (100.00)  | 17 (100.00)             | -       |
|                                    | Abnormal NCS     | 0 (0)        | 0 (0)                   |         |
|                                    | Abnormal CS      | 0 (0)        | 0 (0)                   |         |
| <b>Total bilirubin (mg/dL)</b>     | N                | 17           | 17                      | 0.0840* |
|                                    | Mean±S.D.        | 1.58±3.04    | 2.93±4.39               |         |
|                                    | Median[Min, Max] | 0.6[0.1,12]  | 1[0.3,16.3]             |         |
|                                    | Normal           | 13 (76.47)   | 12 (70.59)              | 0.2150§ |
|                                    | Abnormal NCS     | 4 (23.53)    | 2 (11.76)               |         |
|                                    | Abnormal CS      | 0 (0)        | 3 (17.65) <sup>2)</sup> |         |
| <b>Alkaline phosphatase (IU/L)</b> | N                | 17           | 17                      | 0.1130* |
|                                    | Mean±S.D.        | 257.18±82.36 | 315.82±104.72           |         |
|                                    | Median[Min, Max] | 249[163,455] | 308[160,516]            |         |
|                                    | Normal           | 14 (82.35)   | 7 (41.18)               | 0.0420§ |
|                                    | Abnormal NCS     | 3 (17.65)    | 8 (47.06)               |         |
|                                    | Abnormal CS      | 0 (0)        | 2 (11.76) <sup>3)</sup> |         |

|                                                   |                  |                 |                         |         |
|---------------------------------------------------|------------------|-----------------|-------------------------|---------|
| <b>Aspartate aminotransferase (IU/L)</b>          | N                | 17              | 17                      | 0.7827* |
|                                                   | Mean±S.D.        | 44.29±18.93     | 43.41±15.1              |         |
|                                                   | Median[Min, Max] | 41[22,103]      | 38[28,75]               |         |
|                                                   | Normal           | 8 (47.06)       | 11 (64.71)              | 0.3001† |
|                                                   | Abnormal NCS     | 9 (52.94)       | 6 (35.29)               |         |
|                                                   | Abnormal CS      | 0 (0)           | 0 (0)                   |         |
| <b>Alanine aminotransferase (IU/L)</b>            | N                | 17              | 17                      | 0.6891‡ |
|                                                   | Mean±S.D.        | 30.12±17.4      | 27.94±13.83             |         |
|                                                   | Median[Min, Max] | 27[0,67]        | 26[7,58]                |         |
|                                                   | Normal           | 13 (76.47)      | 13 (76.47)              | 1.0000§ |
|                                                   | Abnormal NCS     | 4 (23.53)       | 4 (23.53)               |         |
|                                                   | Abnormal CS      | 0 (0)           | 0 (0)                   |         |
| <b>Creatinine (mg/dL)</b>                         | N                | 17              | 17                      | 0.7572‡ |
|                                                   | Mean±S.D.        | 0.26±0.05       | 0.26±0.06               |         |
|                                                   | Median[Min, Max] | 0.25[0.21,0.35] | 0.25[0.18,0.41]         |         |
|                                                   | Normal           | 0 (0)           | 0 (0)                   | -       |
|                                                   | Abnormal NCS     | 17 (100.00)     | 17 (100.00)             |         |
|                                                   | Abnormal CS      | 0 (0)           | 0 (0)                   |         |
| <b>Sodium (mmol/L)<sup>1)</sup></b>               | N                | 17              | 16                      | 0.8742‡ |
|                                                   | Mean±S.D.        | 136.41±1.42     | 136.5±1.75              |         |
|                                                   | Median[Min, Max] | 136[133,139]    | 136[134,141]            |         |
|                                                   | Normal           | 16 (94.12)      | 14 (87.50)              | 0.6012§ |
|                                                   | Abnormal NCS     | 1 (5.88)        | 2 (12.50)               |         |
|                                                   | Abnormal CS      | 0 (0)           | 0 (0)                   |         |
| <b>Potassium (mmol/L)<sup>1)</sup></b>            | N                | 17              | 16                      | 0.2244‡ |
|                                                   | Mean±S.D.        | 5.02±0.58       | 5.29±0.67               |         |
|                                                   | Median[Min, Max] | 5.1[4.2,6.6]    | 5.25[4.1,6.7]           |         |
|                                                   | Normal           | 16 (94.12)      | 11 (68.75)              | 0.1473§ |
|                                                   | Abnormal NCS     | 1 (5.88)        | 3 (18.75)               |         |
|                                                   | Abnormal CS      | 0 (0)           | 2 (12.50) <sup>4)</sup> |         |
| <b>Chlorine (mmol/L)<sup>1)</sup></b>             | N                | 17              | 16                      | 0.3901‡ |
|                                                   | Mean±S.D.        | 104.12±1.9      | 104.69±1.85             |         |
|                                                   | Median[Min, Max] | 105[100,107]    | 104.5[102,108]          |         |
|                                                   | Normal           | 17 (100.00)     | 16 (100.00)             | -       |
|                                                   | Abnormal NCS     | 0 (0)           | 0 (0)                   |         |
|                                                   | Abnormal CS      | 0 (0)           | 0 (0)                   |         |
| <b>Total carbon dioxide (mmol/L)<sup>1)</sup></b> | N                | 17              | 16                      | 0.1248* |
|                                                   | Mean±S.D.        | 22.41±2.06      | 21.56±2.61              |         |

|                         |                  |                   |                   |         |
|-------------------------|------------------|-------------------|-------------------|---------|
|                         | Median[Min, Max] | 23[19,27]         | 21[19,29]         |         |
|                         | Normal           | 3 (17.65)         | 2 (12.50)         | 1.0000§ |
|                         | Abnormal NCS     | 14 (82.35)        | 14 (87.50)        |         |
|                         | Abnormal CS      | 0 (0)             | 0 (0)             |         |
| <b>Urinalysis</b>       |                  |                   |                   |         |
| <b>Color</b>            | Dark yellow      | 4 (23.53)         | 6 (35.29)         | 0.8476§ |
|                         | Colorless        | 12 (70.59)        | 10 (58.82)        |         |
|                         | Yellow           | 1 (5.88)          | 1 (5.88)          |         |
|                         | Normal           | 17 (100.00)       | 17 (100.00)       | -       |
|                         | Abnormal NCS     | 0 (0)             | 0 (0)             |         |
|                         | Abnormal CS      | 0 (0)             | 0 (0)             |         |
| <b>Turbidity</b>        | Clear            | 17 (100.00)       | 17 (100.00)       | -       |
|                         | Normal           | 17 (100.00)       | 17 (100.00)       | -       |
|                         | Abnormal NCS     | 0 (0)             | 0 (0)             |         |
|                         | Abnormal CS      | 0 (0)             | 0 (0)             |         |
| <b>Specific gravity</b> | N                | 17                | 17                | 0.5202* |
|                         | Mean±S.D.        | 1.006±0.003       | 1.010±0.007       |         |
|                         | Median[Min, Max] | 1.005[1.003,1.01] | 1.007[1.002,1.02] |         |
|                         | Normal           | 13 (76.47)        | 10 (58.82)        | 0.2714† |
|                         | Abnormal NCS     | 4 (23.53)         | 7 (41.18)         |         |
|                         | Abnormal CS      | 0 (0)             | 0 (0)             |         |
| <b>pH</b>               | N                | 17                | 17                | 0.1577* |
|                         | Mean±S.D.        | 6.50±0.79         | 6.12±0.55         |         |
|                         | Median[Min, Max] | 6.5[5.5,7.5]      | 6[5.5,7]          |         |
|                         | Normal           | 17 (100.00)       | 17 (100.00)       | -       |
|                         | Abnormal NCS     | 0 (0)             | 0 (0)             |         |
|                         | Abnormal CS      | 0 (0)             | 0 (0)             |         |
| <b>Albumin</b>          | negative         | 17 (100.00)       | 13 (76.47)        | 0.1026§ |
|                         | +/-              | 0 (0)             | 4 (23.53)         |         |
|                         | Normal           | 17 (100.00)       | 13 (76.47)        | 0.1026§ |
|                         | Abnormal NCS     | 0 (0)             | 4 (23.53)         |         |
|                         | Abnormal CS      | 0 (0)             | 0 (0)             |         |
| <b>Glucose</b>          | negative         | 17 (100.00)       | 17 (100.00)       | -       |
|                         | Normal           | 17 (100.00)       | 17 (100.00)       | -       |
|                         | Abnormal NCS     | 0 (0)             | 0 (0)             |         |
|                         | Abnormal CS      | 0 (0)             | 0 (0)             |         |
| <b>Ketone</b>           | negative         | 17 (100.00)       | 17 (100.00)       | -       |
|                         | Normal           | 17 (100.00)       | 17 (100.00)       | -       |
|                         | Abnormal NCS     | 0 (0)             | 0 (0)             |         |

|                                |              |             |                        |         |
|--------------------------------|--------------|-------------|------------------------|---------|
|                                | Abnormal CS  | 0 (0)       | 0 (0)                  |         |
| <b>Bilirubin</b>               | negative     | 17 (100.00) | 17 (100.00)            | -       |
|                                | Normal       | 17 (100.00) | 17 (100.00)            | -       |
|                                | Abnormal NCS | 0 (0)       | 0 (0)                  |         |
|                                | Abnormal CS  | 0 (0)       | 0 (0)                  |         |
| <b>Blood</b>                   | negative     | 17 (100.00) | 17 (100.00)            | -       |
|                                | Normal       | 17 (100.00) | 17 (100.00)            | -       |
|                                | Abnormal NCS | 0 (0)       | 0 (0)                  |         |
|                                | Abnormal CS  | 0 (0)       | 0 (0)                  |         |
| <b>Urobilinogen</b>            | +/-          | 17 (100.00) | 17 (100.00)            | -       |
|                                | Normal       | 17 (100.00) | 17 (100.00)            | -       |
|                                | Abnormal NCS | 0 (0)       | 0 (0)                  |         |
|                                | Abnormal CS  | 0 (0)       | 0 (0)                  |         |
| <b>Nitrate</b>                 | negative     | 17 (100.00) | 16 (94.12)             | 1.0000§ |
|                                | +            | 0 (0)       | 1 (5.88)               |         |
|                                | Normal       | 17 (100.00) | 16 (94.12)             | 1.0000§ |
|                                | Abnormal NCS | 0 (0)       | 0 (0)                  |         |
|                                | Abnormal CS  | 0 (0)       | 1 (5.88) <sup>5)</sup> |         |
| <b>White blood cell(s)</b>     | negative     | 11 (64.71)  | 10 (58.82)             | 1.0000§ |
|                                | +/-          | 1 (5.88)    | 0 (0)                  |         |
|                                | 1+           | 3 (17.65)   | 3 (17.65)              |         |
|                                | 2+           | 2 (11.76)   | 3 (17.65)              |         |
|                                | 3+           | 0 (0)       | 1 (5.88)               |         |
|                                | Normal       | 11 (64.71)  | 10 (58.82)             | 0.7242† |
|                                | Abnormal NCS | 6 (35.29)   | 7 (41.18)              |         |
|                                | Abnormal CS  | 0 (0)       | 0 (0)                  |         |
| <b>Red blood cell (/HPF)</b>   | <1           | 13 (76.47)  | 15 (88.24)             | 0.6562§ |
|                                | 1~4          | 4 (23.53)   | 2 (11.76)              |         |
|                                | Normal       | 17 (100.00) | 17 (100.00)            | -       |
|                                | Abnormal NCS | 0 (0)       | 0 (0)                  |         |
|                                | Abnormal CS  | 0 (0)       | 0 (0)                  |         |
| <b>White blood cell (/HPF)</b> | <1           | 8 (47.06)   | 6 (35.29)              | 0.9185§ |
|                                | 1~4          | 6 (35.29)   | 6 (35.29)              |         |
|                                | 5~9          | 2 (11.76)   | 3 (17.65)              |         |
|                                | 10~19        | 1 (5.88)    | 2 (11.76)              |         |
|                                | Normal       | 14 (82.35)  | 12 (70.59)             | 0.6880§ |
|                                | Abnormal NCS | 3 (17.65)   | 5 (29.41)              |         |
|                                | Abnormal CS  | 0 (0)       | 0 (0)                  |         |
| <b>Squamous cell (/HPF)</b>    | <1           | 7 (41.18)   | 7 (41.18)              | 1.0000§ |
|                                | 1~4          | 9 (52.94)   | 8 (47.06)              |         |



|                                 |              |             |             |         |
|---------------------------------|--------------|-------------|-------------|---------|
|                                 | 5~9          | 1 (5.88)    | 1 (5.88)    |         |
|                                 | 10~19        | 0 (0)       | 1 (5.88)    |         |
|                                 | Normal       | 16 (94.12)  | 15 (88.24)  | 1.0000§ |
|                                 | Abnormal NCS | 1 (5.88)    | 2 (11.76)   |         |
|                                 | Abnormal CS  | 0 (0)       | 0 (0)       |         |
| <b>Transitional cell (/HPF)</b> | 0            | 17 (100.00) | 17 (100.00) | -       |
|                                 | Normal       | 17 (100.00) | 17 (100.00) | -       |
|                                 | Abnormal NCS | 0 (0)       | 0 (0)       |         |
|                                 | Abnormal CS  | 0 (0)       | 0 (0)       |         |

\* Wilcoxon Rank Sum test, † Chi-square test, ‡ Independent T-test, § Fisher's exact test

NCS denotes not clinically significant, CS clinically significant, SD standard deviation.

1) One patient (S030) did not perform the test.

2) Total bilirubin. Abnormal CS: Neonatal jaundice, hepatobiliary disease, or breast milk jaundice is suspected.

3) Alkaline phosphatase. Abnormal CS: Neonatal jaundice, hepatobiliary disease, or breast milk jaundice is suspected

4) Potassium Abnormal CS: high level, high level/observation.

5) Nitrate Abnormal CS: Urinary tract infection is suspected.

### 3.2.3. Baseline Hemangioma Inspection Result Analysis

The baseline hemangioma inspection results for both groups are as follows (eTable 10). The mean age (calculated by the age at diagnosis) for the propranolol group was 108.76 days and for the steroid group was 89.24 days. For both groups, the face was the most common location of hemangioma (10 cases for propranolol and 13 for steroid). MRI scans (or ultrasound examinations) were conducted for all subjects and the mean hemangioma volume was 14125.35mm<sup>3</sup> for the propranolol group and 9349.54mm<sup>3</sup> for the steroid group. Although the mean volume for the steroid group was higher, there was no significant difference. An image of the lesion region was taken for all groups and the mean area for the propranolol group was 1318.06mm<sup>2</sup> while the mean area for the steroid group was 1093.51mm<sup>2</sup>. As with the volume, there was no statistically significant difference between the two groups. In addition, most of the lesions were red in color. One patient from each group had an ulceration and two patients from the propranolol showed re-epithelization.

**eTable 10. Results of baseline hemangioma inspection**

|                                            | <b>Propranolol<br/>(N=17)</b> | <b>Steroid<br/>(N=17)</b> | <b>P-value</b> |
|--------------------------------------------|-------------------------------|---------------------------|----------------|
| <b>Age at diagnosis (day)<sup>1)</sup></b> |                               |                           |                |
| N                                          | 17                            | 17                        | 0.3652‡        |
| Mean±S.D.                                  | 108.76±65                     | 89.24±58.81               |                |
| Median[Min, Max]                           | 85[9,247]                     | 73[24,242]                |                |
| <b>Location</b>                            |                               |                           |                |
| - Scalp                                    | 1 (5.88)                      | 2 (11.76) <sup>3)</sup>   | 1.0000§        |
| - Face                                     | 10 (58.82) <sup>2)</sup>      | 13 (76.47)                | 0.4646§        |
| - Neck                                     | 0 (0)                         | 0 (0)                     | -              |
| - Chest                                    | 2 (11.76) <sup>2)</sup>       | 0 (0)                     | 0.4848§        |
| - Abdomen                                  | 1 (5.88)                      | 0 (0)                     | 1.0000§        |
| - Back                                     | 1 (5.88)                      | 0 (0)                     | 1.0000§        |
| - Upper extremity                          | 3 (17.65)                     | 2 (11.76)                 | 1.0000§        |
| - Lower extremity                          | 0 (0)                         | 1 (5.88) <sup>3)</sup>    | 1.0000§        |
| - genitalia                                | 0 (0)                         | 0 (0)                     | -              |
| - Internal organs (viscera, liver, etc.)   | 0 (0)                         | 0 (0)                     | -              |
| <b>MRI</b>                                 |                               |                           |                |
| - No                                       | 0 (0)                         | 0 (0)                     | -              |
| ➔ Yes                                      | 17 (100.00)                   | 17 (100.00)               |                |
| <b>■ size (mm<sup>3</sup>)</b>             |                               |                           |                |
| Mean±S.D.                                  | 14125.35±18246.77             | 9349.54±16015.69          | 0.3348*        |
| Median[Min, Max]                           | 6120[370.8,62197]             | 4048[304,67877.4]         |                |
| <b>Medical photo</b>                       |                               |                           |                |
| - No                                       | 0 (0)                         | 0 (0)                     | -              |
| - Yes                                      | 17 (100.00)                   | 17 (100.00)               |                |
| <b>Size</b>                                |                               |                           |                |
| <b>■ Long axis (mm)</b>                    |                               |                           |                |
| N                                          | 17                            | 17                        | 0.7779‡        |
| Mean±S.D.                                  | 38.47±24.31                   | 36.18±22.69               |                |
| Median[Min, Max]                           | 32[6,101]                     | 30[10,77]                 |                |
| <b>■ Short axis (mm)</b>                   |                               |                           |                |
| N                                          | 17                            | 17                        | 0.8631*        |
| Mean±S.D.                                  | 29.82±23.97                   | 27.88±19.31               |                |
| Median[Min, Max]                           | 21[6,92]                      | 22[8,68]                  |                |
| <b>■ Surface area (mm<sup>2</sup>)</b>     |                               |                           |                |
| N                                          | 17                            | 17                        | 1.0000*        |
| Mean±S.D.                                  | 1318.06±1833.07               | 1093.51±1316.68           |                |

|                                        |                    |                    |         |
|----------------------------------------|--------------------|--------------------|---------|
| Median[Min, Max]                       | 549.5[28.3,7294.2] | 490.6[62.8,3826.9] |         |
| <b>Color</b>                           |                    |                    |         |
| - Red                                  | 11 (64.71)         | 14 (82.35)         | 0.4766§ |
| - Purple                               | 2 (11.76)          | 1 (5.88)           |         |
| - Blue                                 | 1 (5.88)           | 0 (0.00)           |         |
| - Gray                                 | 0 (0.00)           | 1 (5.88)           |         |
| - Apricot                              | 0 (0)              | 0 (0)              |         |
| - Others                               | 3 (17.65)          | 1 (5.88)           |         |
| Purple / Blue                          | 1                  | 0                  |         |
| Red / Blue                             | 0                  | 1                  |         |
| Red to Purple                          | 1                  | 0                  |         |
| Red-Purple                             | 1                  | 0                  |         |
| <b>Height (mm)</b>                     |                    |                    |         |
| N                                      | 17                 | 17                 | 0.4954‡ |
| Mean±S.D.                              | 4.26±2.22          | 3.71±2.49          |         |
| Median[Min, Max]                       | 5[0.5,10]          | 3[1,9]             |         |
| <b>Ulcer</b>                           |                    |                    |         |
| - No                                   | 16 (94.12)         | 16 (94.12)         | 1.0000§ |
| ➔ Yes                                  | 1 (5.88)           | 1 (5.88)           |         |
| <b>■ Long axis (mm)</b>                |                    |                    |         |
| N                                      | 1                  | 1                  | -       |
| Mean±S.D.                              | 12±.               | 7±.                |         |
| Median[Min, Max]                       | 12[12,12]          | 7[7,7]             |         |
| <b>■ Short axis (mm)</b>               |                    |                    |         |
| N                                      | 1                  | 1                  | -       |
| Mean±S.D.                              | 4±.                | 7±.                |         |
| Median[Min, Max]                       | 4[4,4]             | 7[7,7]             |         |
| <b>■ Surface area (mm<sup>2</sup>)</b> |                    |                    |         |
| N                                      | 1                  | 1                  | -       |
| Mean±S.D.                              | 37.7±.             | 38.5±.             |         |
| Median[Min, Max]                       | 37.7[37.7,37.7]    | 38.5[38.5,38.5]    |         |
| <b>Re-epithelization</b>               |                    |                    |         |
| - No                                   | 15 (88.24)         | 17 (100.00)        | 0.4848§ |
| - Yes                                  | 2 (11.76)          | 0 (0.00)           |         |

\* Wilcoxon Rank Sum test, ‡ Independent T-test, § Fisher's exact test  
SD denotes standard deviation.

<sup>1)</sup> Age at diagnosis = Date of diagnosis – Date of birth

<sup>2)</sup> Two lesions in one propranolol group (Face, Chest/S026)

<sup>3)</sup> One case overlapped in steroid group (Scalp, Lower extremity/S002)

After hearing each patient's medical history, it was found that the mean age when hemangioma began was 0.68 months for the propranolol group and 0.50 months for the steroid group. The mean period when hemangioma grew the most was 3.12 months for the propranolol group and 2.53 for the steroid group. In the two groups, there was a total of 3 family members who also had hemangioma (propranolol group: patient's mother, steroid group: two female cousins). Furthermore, there was no statistically significant difference in change between the two groups.

**eTable 11. History taking of patients**

|                                            | Propranolol<br>(N=17) | Steroid<br>(N=17) | P-value |
|--------------------------------------------|-----------------------|-------------------|---------|
| <b>History</b>                             |                       |                   |         |
| <b>■ found at birth</b>                    |                       |                   |         |
| - Yes                                      | 2 (11.76)             | 4 (23.53)         | 0.6562§ |
| - No                                       | 15 (88.24)            | 13 (76.47)        |         |
| <b>■ Herald sign</b>                       |                       |                   |         |
| - Yes                                      | 0 (0)                 | 3 (17.65)         | 0.2273§ |
| - No                                       | 17 (100.00)           | 14 (82.35)        |         |
| <b>■ Starting time of growth</b>           |                       |                   |         |
| N                                          | 17                    | 17                | 0.5267* |
| Mean±S.D.                                  | 0.68±0.79             | 0.50±0.55         |         |
| Median[Min, Max]                           | 0.5[0,3]              | 0.3[0,2]          |         |
| <b>■ The time of biggest size</b>          |                       |                   |         |
| N                                          | 17                    | 17                | 0.3901‡ |
| Mean±S.D.                                  | 3.12±2.23             | 2.53±1.66         |         |
| Median[Min, Max]                           | 2[0,8]                | 2[0,6]            |         |
| <b>Family History</b>                      |                       |                   |         |
| - Yes                                      | 1 (5.88)              | 2 (11.76)         | 1.0000§ |
| - No                                       | 16 (94.12)            | 15 (88.24)        |         |
| <b>Risk factor</b>                         |                       |                   |         |
| <b>■ Genetic factor</b>                    |                       |                   |         |
| - No                                       | 17 (100.00)           | 16 (94.12)        | 1.0000§ |
| - Chromosomal abnormality                  | 0 (0)                 | 0 (0)             |         |
| - Others                                   | 0 (0)                 | 1 (5.88)          |         |
| <b>■ Environmental factor<sup>1)</sup></b> |                       |                   |         |
| - No                                       | 7 (41.18)             | 10 (58.82)        | 0.3035† |
| → Yes                                      | 10 (58.82)            | 7 (41.18)         |         |
| - Maternal Smoking                         | 3                     | 0                 |         |
| - Maternal alcohol abuse                   | 0                     | 0                 |         |
| - Maternal drug                            | 0                     | 0                 |         |
| - Intrauterine physical constriction       | 1                     | 0                 |         |
| - Preterm birth                            | 3                     | 3                 |         |
| - Premature baby                           | 1                     | 2                 |         |
| - Other                                    | 6                     | 5                 |         |
| Single umbilical artery                    | 1                     | 0                 |         |
| In vitro fertilization                     | 1                     | 1                 |         |
| Test-tube baby                             | 0                     | 1                 |         |

|                                               |   |   |
|-----------------------------------------------|---|---|
| Asthma of father                              | 0 | 1 |
| Artificial fertilization, Placenta previa     | 1 | 0 |
| Myoma during pregnancy                        | 1 | 0 |
| Ovarian tumorectomy during pregnancy          | 0 | 1 |
| Threatened abortion                           | 1 | 0 |
| Caesarean section                             | 1 | 0 |
| Father on thyroid medication during pregnancy | 0 | 1 |

\* Wilcoxon Rank Sum test, † Chi-square test, ‡ Independent T-test, § Fisher's exact test

SD denotes standard deviation.

<sup>1)</sup> Two environmental factors in one propranolol group,

Three environmental factors in one steroid group

- S002: Preterm birth, premature baby
- S009: Preterm birth, Others (Father on thyroid medication during pregnancy)
- S012: Preterm birth, premature baby
- S021: Intrauterine physical constriction, Preterm birth, premature baby, Others (Artificial fertilization, Placenta previa)
- S028: Maternal Smoking, Others (Single umbilical artery)

### 3.2.4. Concomitant Drug

eTable 12 shows the concomitant drugs of patients during the duration of the trial. A participant who took regular medication of at least one type of drug is classified as consuming a concomitant drug. During the duration of the trial, 60 people (100%) in the propranolol group and 4 people (44.44%) in the steroid group took a concomitant drug. In the propranolol group, there were 112 cases of concomitant drug consumption by 13 people, and in the steroid group, there were 107 cases by 14 people.

**eTable 12. Concomitant drug during the duration of the trial.**

|                         | <b>Propranolol<br/>(N=17)</b> | <b>Steroid<br/>(N=17)</b> | <b>P-value</b> |
|-------------------------|-------------------------------|---------------------------|----------------|
| <b>Concomitant Drug</b> |                               |                           |                |
| - Yes                   | 13 (76.47)                    | 14 (82.35)                | 1.0000§        |
| - No                    | 4 (23.53)                     | 3 (17.65)                 |                |

§ Fisher's exact test

In the propranolol group, the most commonly consumed concomitant drug was Hydrocortisone (D07AA02) (8 cases, 5 people), N02BE01 (Acetaminophen) (8 cases, 6 people), and A07FA01 (Bacillus licheniformis, Ramnos Granule, Medilac-S Powder) (6 cases, 6 people). In the steroid group, the most commonly consumed concomitant drug was R01BA53 (Comy Syrup, Coben Syrup, Colmin-A Syrup) (10 cases/4 people) and A07FA01 (Bacillus licheniformis, Ramnos Granule, Medilac-S Powder) (6 cases, 5 people) according to eTable 13.



**eTable 13. Concomitant drug history (unit: number)**

|          |         |                                                                                                                                       | No. of patients       |                   | No. of events         |                   |
|----------|---------|---------------------------------------------------------------------------------------------------------------------------------------|-----------------------|-------------------|-----------------------|-------------------|
|          |         |                                                                                                                                       | Propranolol<br>(N=17) | Steroid<br>(N=17) | Propranolol<br>(N=70) | Steroid<br>(N=60) |
| ATC code | CM      |                                                                                                                                       |                       |                   |                       |                   |
| A02      | A02BA02 | Ranitidine                                                                                                                            | 0 (0)                 | 1 (5.88)          | 0 (0)                 | 1 (0.93)          |
| A03      | A03AA05 | Trimebutine maleate                                                                                                                   | 1 (5.88)              | 0 (0)             | 1 (0.89)              | 0 (0)             |
|          | A03FA03 | Domperidone                                                                                                                           | 2 (11.76)             | 3 (17.65)         | 2 (1.79)              | 4 (3.74)          |
| A07      | A07BC05 | Diocahedral smectite                                                                                                                  | 2 (11.76)             | 1 (5.88)          | 3 (2.68)              | 1 (0.93)          |
|          | A07DA03 | Lopmin Capsule                                                                                                                        | 1 (5.88)              | 0 (0)             | 1 (0.89)              | 0 (0)             |
|          | A07FA01 | Bacillus licheniformis, Ramnos granule, Medilac-S powder                                                                              | 6 (35.29)             | 5 (29.41)         | 6 (5.36)              | 6 (5.61)          |
|          | A07FA02 | Olybiol-S capsule, Saccharomyces Boulardii                                                                                            | 2 (11.76)             | 1 (5.88)          | 2 (1.79)              | 2 (1.87)          |
|          | A07FA5  | Bacillus subtilis                                                                                                                     | 0 (0)                 | 1 (5.88)          | 0 (0)                 | 1 (0.93)          |
| A09      | A09AA04 | Beta-galactosidase                                                                                                                    | 1 (5.88)              | 0 (0)             | 1 (0.89)              | 0 (0)             |
| D01      | D01AC05 | Isoconazole Nitrate                                                                                                                   | 1 (5.88)              | 0 (0)             | 1 (0.89)              | 0 (0)             |
| D06      | D06AX09 | Mupirocin                                                                                                                             | 0 (0)                 | 1 (5.88)          | 0 (0)                 | 1 (0.93)          |
| D07      | D07AA02 | Hydrocortisone                                                                                                                        | 5 (29.41)             | 1 (5.88)          | 11 (9.82)             | 1 (0.93)          |
|          | D07AA03 | Prednisolone valeroacetate                                                                                                            | 1 (5.88)              | 2 (11.76)         | 6 (5.36)              | 3 (2.8)           |
|          | D07AB08 | Desonide                                                                                                                              | 1 (5.88)              | 0 (0)             | 1 (0.89)              | 0 (0)             |
|          | D07AC18 | Prednicarbate                                                                                                                         | 3 (17.65)             | 0 (0)             | 3 (2.68)              | 0 (0)             |
| H02      | H02AB04 | Methylprednisolone                                                                                                                    | 0 (0)                 | 1 (5.88)          | 0 (0)                 | 1 (0.93)          |
|          | H02AB06 | Prednisolone                                                                                                                          | 3 (17.65)             | 0 (0)             | 3 (2.68)              | 0 (0)             |
| J01      | J01CA04 | Amoxicillin                                                                                                                           | 4 (23.53)             | 2 (11.76)         | 5 (4.46)              | 3 (2.8)           |
|          | J01CR02 | Moxamentin Duo Syrup, Amocla Duo Syrup, Augmentin Syrup, Crasigen Duo Syrup, Cramoxin Dry Syrup, Maxiclan Duo Syrup, Duonex Dry Syrup | 4 (23.53)             | 4 (23.53)         | 5 (4.46)              | 6 (5.61)          |
|          | J01DC04 | Cefaclor                                                                                                                              | 0 (0)                 | 1 (5.88)          | 0 (0)                 | 1 (0.93)          |
|          | J01DD08 | Cefixime                                                                                                                              | 0 (0)                 | 1 (5.88)          | 0 (0)                 | 1 (0.93)          |
|          | J01DD15 | Cefdinir                                                                                                                              | 0 (0)                 | 1 (5.88)          | 0 (0)                 | 2 (1.87)          |
|          | J01FA09 | Clarithromycin                                                                                                                        | 0 (0)                 | 1 (5.88)          | 0 (0)                 | 2 (1.87)          |
|          | J01FA10 | Azithromycin                                                                                                                          | 0 (0)                 | 1 (5.88)          | 0 (0)                 | 1 (0.93)          |
| J05      | J05AX05 | Inosiplex                                                                                                                             | 1 (5.88)              | 0 (0)             | 1 (0.89)              | 0 (0)             |
| J07      | J07AG51 | ActHib                                                                                                                                | 0 (0)                 | 1 (5.88)          | 0 (0)                 | 1 (0.93)          |
|          | J07CA02 | Infanrix-IPV                                                                                                                          | 0 (0)                 | 2 (11.76)         | 0 (0)                 | 2 (1.87)          |
| M01      | M01AE01 | Ibuprofen                                                                                                                             | 0 (0)                 | 2 (11.76)         | 0 (0)                 | 2 (1.87)          |
|          | M01AE14 | Dexibuprofen, Dexpanthenol                                                                                                            | 5 (29.41)             | 1 (5.88)          | 6 (5.36)              | 1 (0.93)          |
| M09      | M09AB   | Mucolase Tab, Ceratase Tab, Serronase Tab<br>Duonase Tab, Leodase Tab.                                                                | 1 (5.88)              | 4 (23.53)         | 3 (2.68)              | 6 (5.61)          |
| N02      | N02BE01 | Acetaminophen                                                                                                                         | 6 (35.29)             | 4 (23.53)         | 8 (7.14)              | 5 (4.67)          |

|            |         |                                                                          |           |           |          |           |
|------------|---------|--------------------------------------------------------------------------|-----------|-----------|----------|-----------|
| <b>N05</b> | N05BB01 | Hydroxyzine, Hydroxyzine HCl                                             | 3 (17.65) | 0 (0)     | 4 (3.57) | 0 (0)     |
| <b>R01</b> | R01BA02 | Pseudoephedrine, Pseudoephedrine HCl                                     | 1 (5.88)  | 1 (5.88)  | 2 (1.79) | 1 (0.93)  |
|            | R01BA52 | Actifed Syrup                                                            | 0 (0)     | 2 (11.76) | 0 (0)    | 2 (1.87)  |
|            | R01BA53 | Comy Syrup, Coben Syrup, Colmin-A Syrup                                  | 5 (29.41) | 4 (23.53) | 6 (5.36) | 10 (9.35) |
| <b>R03</b> | R03CC   | Formoterol fumarate                                                      | 2 (11.76) | 2 (11.76) | 2 (1.79) | 2 (1.87)  |
|            | R03CC11 | Tulobuterol                                                              | 2 (11.76) | 1 (5.88)  | 2 (1.79) | 1 (0.93)  |
|            | R03DC02 | Pranlukast hydrate                                                       | 1 (5.88)  | 0 (0)     | 1 (0.89) | 0 (0)     |
| <b>R05</b> | R05CA12 | Hederae helix fluid, Ivy leaf dried extract                              | 1 (5.88)  | 3 (17.65) | 1 (0.89) | 3 (2.8)   |
|            | R05CB01 | Acetylcysteine                                                           | 3 (17.65) | 3 (17.65) | 4 (3.57) | 6 (5.61)  |
|            | R05CB03 | S-carboxymethylcysteine                                                  | 2 (11.76) | 0 (0)     | 3 (2.68) | 0 (0)     |
|            | R05CB10 | Ambrocol Tab, Konitop Syrup, ambrocol syrup, ROXOL-C syrup               | 1 (5.88)  | 2 (11.76) | 1 (0.89) | 5 (4.67)  |
|            | R05CB15 | Erdosteine                                                               | 0 (0)     | 1 (5.88)  | 0 (0)    | 1 (0.93)  |
|            | R05DB21 | Privituss Suspension                                                     | 0 (0)     | 1 (5.88)  | 0 (0)    | 2 (1.87)  |
|            | R05FA   | Codenal Solution, Codenal Tab, Codawon Syrup, Cough Syrup                | 2 (11.76) | 4 (23.53) | 2 (1.79) | 5 (4.67)  |
| <b>R06</b> | R06A    | bepotastine calcium dihydrate                                            | 0 (0)     | 1 (5.88)  | 0 (0)    | 3 (2.8)   |
|            | R06AB04 | Chlorpheniramine, Chlorpheniramine Maleate                               | 2 (11.76) | 3 (17.65) | 5 (4.46) | 5 (4.67)  |
|            | R06AD07 | Mequitazine                                                              | 1 (5.88)  | 1 (5.88)  | 3 (2.68) | 1 (0.93)  |
|            | R06AE09 | Levocetirizine HCl                                                       | 0 (0)     | 1 (5.88)  | 0 (0)    | 1 (0.93)  |
|            | R06AX17 | Ketotifen, Ketotifen Fumarate                                            | 2 (11.76) | 0 (0)     | 2 (1.79) | 0 (0)     |
|            | R06CB06 | Ambroxol hydrochloride                                                   | 0 (0)     | 1 (5.88)  | 0 (0)    | 1 (0.93)  |
| <b>R07</b> | R07AX   | Skamin Syrup, Umckamin Syrup, Canium Syrup, Pelagon Syrup, Pelarum Syrup | 3 (17.65) | 2 (11.76) | 3 (2.68) | 2 (1.87)  |
| <b>S01</b> | S01AA30 | Terramycin Eye ointment, Oxytetracycline, Terramycin                     | 2 (11.76) | 2 (11.76) | 2 (1.79) | 2 (1.87)  |

ATC denotes anatomic therapeutic chemical, CM concomitant medication.

## **4. Results of Efficacy Evaluation**

### **4.1. Primary Efficacy Evaluation**

The primary efficacy variable is the treatment response using hemangioma volume measured by an MRI scan or ultrasound examination (when the patient or guardian refused an MRI scan for a number of reasons).

The response of treatment is classified as follows:

- Reaction is defined as proliferative stop or regression
  - Proliferative stop is defined as no further increase in the size (by volume) after treatment began or a size reduction of less than 25%.
  - Regression is defined as a size reduction of more than 25% compared to original size after treatment began.
- Non-reaction means increase of the lesion.
  - Increase is defined as the size (by volume) at primary efficacy evaluation point being greater than the size measured when treatment started.

In our analysis, all missing values in the ITT group and ITT group applying MI were replaced with “Reaction” or “Non-reaction” and categorized into two groups: ITT group and PP group. The final research results were results from the ITT analysis group applying MI. MI was used to predict the Reaction/Non-reaction of the secondary efficacy variables size (area), proliferative stop time point, regression time point, color, ulceration size, and presence of re-epithelization.

#### 4.1.1. Missing Value Adjustment by Applying Multiple Imputation

For the ITT analysis group applying MI, the treatment response rate in the propranolol group was 95.65% and that of the steroid group was 91.94%. The difference in response rates between the two groups was 3.71%, and the 95% confidence interval was [-15.43, 22.84]. Because the lower limit of the confidence interval (-15.43%) was greater than -20%, it can be said that propranolol is non-inferior. Also, differences in response rate between the two groups are not significant. (P-value=0.7041)

**eTable 14. Treatment response rate (ITT analysis group applying multiple imputation)**

|                                                           | Propranolol<br>(N=17) | Steroid<br>(N=17) | Difference in response rate<br>p <sub>t</sub> -p <sub>c</sub> [95% C.I.] | P-value  |
|-----------------------------------------------------------|-----------------------|-------------------|--------------------------------------------------------------------------|----------|
| <b>Treatment response rate (applying MI)<sup>1)</sup></b> |                       |                   |                                                                          |          |
| - Reaction                                                | 95.65                 | 91.94             | 3.71                                                                     | 0.7041 † |
| - Non-reaction                                            | 4.35                  | 8.06              | [-15.43,22.84]                                                           |          |

† One-sample t-test

ITT denotes intention to treat, MI multiple imputation, CI confidence interval.

<sup>1)</sup> 100 times imputation were applied. Difference in response rate and its confidence interval is the summary of 100 results.<sup>12</sup>

#### 4.1.2. Missing Value Adjustment by Replacement with “Non-reaction”

As a result of the analysis of supplementary validation results for four subjects with missing values (which were replaced with “Non-reaction”), the treatment response rate in the propranolol group was 94.12% and that of the steroid group was 82.35%. The Fisher’s Exact test result was that the treatment response rates between the two groups could not be said to be different. The difference in response rates between the two groups was 11.76%, and the 95% confidence interval was [-9.53, 33.06]. Because the lower limit of the confidence interval (-9.53%) was greater than -20%, it can be said that is non-inferior.

**eTable 15. Treatment response rate (ITT analysis group replaced with “Non-reaction”)**

|                                                                       | <b>Propranolol<br/>(N=17)</b> | <b>Steroid<br/>(N=17)</b> | <b>Difference in response<br/>rates<br/>p<sub>t</sub>-p<sub>c</sub> [95% C.I.]</b> | <b>P-value</b> |
|-----------------------------------------------------------------------|-------------------------------|---------------------------|------------------------------------------------------------------------------------|----------------|
| <b>Treatment response rate (“Non-reaction”) – no. of patients (%)</b> |                               |                           |                                                                                    |                |
| <b>- Reaction</b>                                                     | 16 (94.12)                    | 14 (82.35)                | 11.76                                                                              | 0.6012**       |
| <b>- Non-reaction</b>                                                 | 1 (5.88)                      | 3 (17.65)                 | [-9.53,33.06]                                                                      |                |

\*\* Fisher’s Exact test

ITT denotes intention to treat, CI confidence interval.

#### 4.1.3. Missing Value Adjustment by Replacement with “Reaction”

Analysis of supplementary validation results for four subjects with missing values (also replaced with “reactive”) revealed the same results (non-inferior). Since the lower limit of the 95% confidence interval (-18.65, 18.65) is greater than -20%, it is non-inferior.

**Table 16. Treatment response rate (Missing values were replaced with “Reaction”)**

|                                                                   | <b>Propranolol<br/>(N=17)</b> | <b>Steroid<br/>(N=17)</b> | <b>Difference in response rates<br/>p<sub>t</sub>-p<sub>c</sub> [95% C.I.]</b> | <b>P-value</b> |
|-------------------------------------------------------------------|-------------------------------|---------------------------|--------------------------------------------------------------------------------|----------------|
| <b>Treatment response rate (“Reaction”) – no. of patients (%)</b> |                               |                           |                                                                                |                |
| <b>- Reaction</b>                                                 | 17 (100)                      | 17 (100)                  | 0                                                                              | -              |
| <b>- Non-reaction</b>                                             | 0 (0)                         | 0 (0)                     | [-18.65,18.65] <sup>1)</sup>                                                   |                |

<sup>1)</sup> R software (R for Windows, version 3.1.2/R package – ExactCIdiff)  
CI denotes confidence interval.

#### 4.1.4. Primary Efficacy Evaluation (PP population)

In the case of the PP group, the 4 participants with missing values were excluded and the difference in response rate between the two groups was found to be 0%. The 95% confidence interval was [-20.59, 23.16] and because the lower limit is smaller than -20%, we cannot say that it is non-inferior.

**eTable 17. Treatment response rate (PP population)**

|                                                                      | <b>Propranolol<br/>(N=17)</b> | <b>Steroid<br/>(N=17)</b> | <b>Difference in response<br/>rates<br/>p<sub>t</sub>-p<sub>c</sub> [95% C.I.]</b> | <b>P-value</b> |
|----------------------------------------------------------------------|-------------------------------|---------------------------|------------------------------------------------------------------------------------|----------------|
| <b>Treatment response rate (PP population) – no. of patients (%)</b> |                               |                           |                                                                                    |                |
| <b>- Reaction</b>                                                    | 16 (100)                      | 14 (100)                  | 0                                                                                  | -              |
| <b>- Non-reaction</b>                                                | 0 (0)                         | 0 (0)                     | [-20.59,23.16] <sup>1)</sup>                                                       |                |

<sup>1)</sup> Calculated by using R software (R for Windows, version 3.1.2/R package – ExactCIdiff)  
PP denotes per protocol, CI confidence interval.

## 4.2. Secondary Efficacy Evaluation

In this study, the secondary efficacy variable was hemangioma size (area), hemangioma color, presence of ulceration and ulceration size, presence of re-epithelization, proliferative stop point, regression point, and compliance.

At each time point, the mean, standard deviation, median, minimum and maximum values were calculated for continuous data and the frequency and percentage was presented for categorical data.

### 4.2.1. Size (Volume) of Hemangioma

The rate of change of size (volume) of hemangioma is defined as following;

The rate of change of size(volume) of hemangioma(%)

$$= \frac{\text{Volume of hemangioma measured in week 16(visit 6)} - \text{Volume of hemangioma measured in baseline(visit 1)}}{\text{Volume of hemangioma measured in baseline(visit 1)}}$$

The mean, standard deviation, and other descriptive statistics used to assess the response of treatment are presented in eTable 18. Independent t-test evaluates the difference between the means of rate of change of volume of hemangioma in the propranolol group and steroid group.

The volume reduction change (%) in the propranolol group was 55.87% and that of the steroid group was 46.52%. The rate of change for the propranolol group was higher than that of the steroid group, but there was no statistically significant difference.

**eTable 18. Changes of hemangioma volume**

|                             | <b>Propranolol<br/>(N=17)</b> | <b>Steroid<br/>(N=17)</b> | <b>P-value</b> |
|-----------------------------|-------------------------------|---------------------------|----------------|
| <b>Changes of Volume %)</b> |                               |                           |                |
| N                           | 16                            | 14                        | 0.2684†        |
| Mean±S.D.                   | -55.87±18.92                  | -46.52±26.24              |                |
| Median[Min, Max]            | -62.76[-78.24,-20.49]         | -48.17[-80.2,-3.83]       |                |

† Independent T-test

SD denotes standard deviation.



#### 4.2.2. Size (surface area) of Hemangioma

The mean, standard deviation, median, minimum and maximum values of the size of hemangioma for each group, time point, and interaction between group and time points are shown in eTable 19. Generalized estimating equation (GEE) was used to determine if there are any differences in hemangioma size (area) and ulceration size depending on time point, or differences between groups, or group patterns across different time points. Differences between groups, time points, and interaction (group \* time point) were all not significant (P-value=0.5819, 0.1649, 0.2818 respectively). Thus, it cannot be said that there is a difference between the two groups in the change in hemangioma size. However, although controlling for time did not result in a statistically significant difference (P-value=0.8542, 0.8815, 0.7076), controlling for group did (P-value=0.0148, 0.0077, 0.0405). The average size of hemangioma decreased over time, regardless of the group.

**eTable 19. Size (surface area) of hemangioma**

|                            |                  | Size of hemangioma |                |                                |
|----------------------------|------------------|--------------------|----------------|--------------------------------|
|                            |                  | Long axis(mm)      | Short axis(mm) | Surface area(mm <sup>2</sup> ) |
| <b>Group</b>               |                  |                    |                |                                |
| <b>Propranolol</b>         | N                | 119                | 119            | 119                            |
|                            | Mean±S.D.        | 33.91±24.73        | 24.31±21.6     | 1050.28±1707.87                |
|                            | Median[Min, Max] | 28[5,110]          | 16[2,95]       | 361.1[11,8203.3]               |
| <b>Steroid</b>             | N                | 107                | 107            | 107                            |
|                            | Mean±S.D.        | 31.6±21.37         | 22.24±15.12    | 782.29±961.55                  |
|                            | Median[Min, Max] | 28[5,77]           | 17[4,68]       | 423.9[18.8,3826.9]             |
| <b>Time point</b>          |                  |                    |                |                                |
| <b>Visit 1 (Screening)</b> | N                | 34                 | 34             | 34                             |
|                            | Mean±S.D.        | 37.32±23.18        | 28.85±21.45    | 1205.79±1575.66                |
|                            | Median[Min, Max] | 31.5[6,101]        | 21.5[6,92]     | 520.05[28.3,7294.2]            |
| <b>Visit 2 (Week 1)</b>    | N                | 32                 | 32             | 32                             |
|                            | Mean±S.D.        | 34.81±23.61        | 25.13±19.19    | 1013.19±1428.78                |
|                            | Median[Min, Max] | 30[6,108]          | 18.5[4,80]     | 437.25[18.8,6782.4]            |
| <b>Visit 3 (Week 4)</b>    | N                | 32                 | 32             | 32                             |
|                            | Mean±S.D.        | 33.78±24.13        | 23.72±18.93    | 959.87±1423.59                 |
|                            | Median[Min, Max] | 30[6,110]          | 17.5[4,80]     | 412.15[23.6,6908]              |
| <b>Visit 4 (Week 8)</b>    | N                | 32                 | 32             | 32                             |
|                            | Mean±S.D.        | 32.5±23.63         | 22.72±19.77    | 917.21±1568.63                 |
|                            | Median[Min, Max] | 28[5,110]          | 16[3,95]       | 380.75[19.6,8203.3]            |
| <b>Visit 5 (Week 12)</b>   | N                | 32                 | 32             | 32                             |

|                            |                    |                  |             |             |                    |
|----------------------------|--------------------|------------------|-------------|-------------|--------------------|
|                            |                    | Mean±S.D.        | 31.44±23.35 | 21.72±17.58 | 832.28±1354.75     |
|                            |                    | Median[Min, Max] | 26[5,110]   | 15.5[3,80]  | 337.55[19.6,6908]  |
| <b>Visit 6 (Week 16)</b>   |                    | N                | 32          | 32          | 32                 |
|                            |                    | Mean±S.D.        | 30.22±22.79 | 20.88±17.5  | 781.45±1311.87     |
|                            |                    | Median[Min, Max] | 26[5,105]   | 15[3,80]    | 318.3[19.6,6594]   |
| <b>Visit 7 (Week 20)</b>   |                    | N                | 32          | 32          | 32                 |
|                            |                    | Mean±S.D.        | 29.34±22.73 | 19.97±16.87 | 736.37±1226.45     |
|                            |                    | Median[Min, Max] | 25[5,102]   | 15[2,75]    | 311.65[11,6005.3]  |
| <b>Group*Time point</b>    |                    |                  |             |             |                    |
| <b>Visit 1 (Screening)</b> | <b>Propranolol</b> | N                | 17          | 17          | 17                 |
|                            |                    | Mean±S.D.        | 38.47±24.31 | 29.82±23.97 | 1318.06±1833.07    |
|                            |                    | Median[Min, Max] | 32[6,101]   | 21[6,92]    | 549.5[28.3,7294.2] |
|                            | <b>Steroid</b>     | N                | 17          | 17          | 17                 |
|                            |                    | Mean±S.D.        | 36.18±22.69 | 27.88±19.31 | 1093.51±1316.68    |
|                            |                    | Median[Min, Max] | 30[10,77]   | 22[8,68]    | 490.6[62.8,3826.9] |
| <b>Visit 2 (Week 1)</b>    | <b>Propranolol</b> | N                | 17          | 17          | 17                 |
|                            |                    | Mean±S.D.        | 36.76±25.66 | 27.18±22.09 | 1189.75±1738       |
|                            |                    | Median[Min, Max] | 30[6,108]   | 20[6,80]    | 447.5[28.3,6782.4] |
|                            | <b>Steroid</b>     | N                | 15          | 15          | 15                 |
|                            |                    | Mean±S.D.        | 32.6±21.73  | 22.8±15.7   | 813.1±993.64       |
|                            |                    | Median[Min, Max] | 30[6,77]    | 17[4,55]    | 427[18.8,3324.5]   |
| <b>Visit 3 (Week 4)</b>    | <b>Propranolol</b> | N                | 17          | 17          | 17                 |
|                            |                    | Mean±S.D.        | 35.76±26.49 | 25.59±22.38 | 1145.69±1765.08    |
|                            |                    | Median[Min, Max] | 25[8,110]   | 20[4,80]    | 361.1[31.4,6908]   |
|                            | <b>Steroid</b>     | N                | 15          | 15          | 15                 |
|                            |                    | Mean±S.D.        | 31.53±21.83 | 21.6±14.55  | 749.27±915.14      |
|                            |                    | Median[Min, Max] | 30[6,75]    | 17[5,55]    | 423.9[23.6,3238.1] |
| <b>Visit 4 (Week 8)</b>    | <b>Propranolol</b> | N                | 17          | 17          | 17                 |
|                            |                    | Mean±S.D.        | 33.88±25.7  | 24.41±23.92 | 1094.68±1996.15    |
|                            |                    | Median[Min, Max] | 28[6,110]   | 17[3,95]    | 361.1[23.6,8203.3] |
|                            | <b>Steroid</b>     | N                | 15          | 15          | 15                 |
|                            |                    | Mean±S.D.        | 30.93±21.83 | 20.8±14.29  | 716.07±901.68      |
|                            |                    | Median[Min, Max] | 28[5,75]    | 15[4,55]    | 423.9[19.6,3238.1] |
| <b>Visit 5 (Week 12)</b>   | <b>Propranolol</b> | N                | 17          | 17          | 17                 |
|                            |                    | Mean±S.D.        | 32.59±25.33 | 22.53±20.63 | 951.75±1693.61     |
|                            |                    | Median[Min, Max] | 25[5,110]   | 16[3,80]    | 345.4[19.6,6908]   |
|                            | <b>Steroid</b>     | N                | 15          | 15          | 15                 |
|                            |                    | Mean±S.D.        | 30.13±21.68 | 20.8±14.01  | 696.88±865.42      |

|                          |                      |                             |             |             |                    |
|--------------------------|----------------------|-----------------------------|-------------|-------------|--------------------|
|                          |                      | Median[Min, Max]            | 27[5,73]    | 15[4,54]    | 329.7[19.6,3094.5] |
| <b>Visit 6 (Week 16)</b> | <b>Propranolol</b>   | N                           | 17          | 17          | 17                 |
|                          |                      | Mean±S.D.                   | 30.59±24.47 | 21.12±20.52 | 866.09±1635.07     |
|                          |                      | Median[Min, Max]            | 25[5,105]   | 15[3,80]    | 294.4[19.6,6594]   |
|                          | <b>Steroid</b>       | N                           | 15          | 15          | 15                 |
|                          |                      | Mean±S.D.                   | 29.8±21.56  | 20.6±14.02  | 685.52±858.42      |
|                          |                      | Median[Min, Max]            | 27[5,73]    | 15[4,54]    | 329.7[19.6,3094.5] |
| <b>Visit 7 (Week 20)</b> | <b>Propranolol</b>   | N                           | 17          | 17          | 17                 |
|                          |                      | Mean±S.D.                   | 29.29±24.27 | 19.53±19.41 | 785.94±1503.22     |
|                          |                      | Median[Min, Max]            | 25[5,102]   | 15[2,75]    | 294.4[11,6005.3]   |
|                          | <b>Steroid</b>       | N                           | 15          | 15          | 15                 |
|                          |                      | Mean±S.D.                   | 29.4±21.71  | 20.47±14.12 | 680.19±861.29      |
|                          |                      | Median[Min, Max]            | 27[5,73]    | 15[4,54]    | 329.7[18.8,3094.5] |
|                          | <b>Group</b>         | <b>P-value<sup>1)</sup></b> | 0.8542      | 0.8815      | 0.7076             |
|                          | <b>Time of visit</b> | <b>P-value<sup>2)</sup></b> | 0.0148      | 0.0077      | 0.0405             |

SD denotes standard deviation. <sup>1)</sup> GEE; effect of treatment <sup>2)</sup> GEE; effect of time point

### 4.2.3. Color of Hemangioma

Frequency and percentage of color of hemangioma by group, time and group\*time effects are shown in eTable 20. Most hemangiomas were either red or blue in color and never apricot. Results from generalized estimating equation (GEE) showed that group, time, group\*time effects were all nonsignificant.

**eTable 20. Color of hemangioma**

|                         | Color       |             |           |           |              |            |           |          | P-value              |
|-------------------------|-------------|-------------|-----------|-----------|--------------|------------|-----------|----------|----------------------|
|                         | Red         | Red /Purple | Purple    | Red /Blue | Purple /Blue | Blue       | Gray      | Pink     |                      |
| <b>Group</b>            |             |             |           |           |              |            |           |          |                      |
| Propranolol             | 94 (78.99)  | 5 (4.20)    | 5 (4.20)  | 0 (0)     | 2 (1.68)     | 12 (10.08) | 0 (0)     | 1 (0.84) | 0.6072 <sup>1)</sup> |
| Steroid                 | 92 (85.98)  | 0 (0)       | 3 (2.80)  | 2 (1.87)  | 0 (0)        | 3 (2.80)   | 7 (6.54)  | 0 (0)    |                      |
| <b>Time point</b>       |             |             |           |           |              |            |           |          |                      |
| Visit 1 (Screening)     | 25 (73.53)  | 2 (5.88)    | 3 (8.82)  | 1 (2.94)  | 1 (2.94)     | 1 (2.94)   | 1 (2.94)  | 0 (0)    | 0.1114 <sup>2)</sup> |
| Visit 2 (Week 1)        | 25 (78.13)  | 0 (0)       | 3 (9.38)  | 1 (3.13)  | 1 (3.13)     | 1 (3.13)   | 1 (3.13)  | 0 (0)    |                      |
| Visit 3 (Week 4)        | 27 (84.38)  | 0 (0)       | 1 (3.13)  | 0 (0)     | 0 (0)        | 2 (6.25)   | 1 (3.13)  | 1 (3.13) |                      |
| Visit 4 (Week 8)        | 26 (81.25)  | 1 (3.13)    | 1 (3.13)  | 0 (0)     | 0 (0)        | 3 (9.38)   | 1 (3.13)  | 0 (0)    |                      |
| Visit 5 (Week 12)       | 27 (84.38)  | 1 (3.13)    | 0 (0)     | 0 (0)     | 0 (0)        | 3 (9.38)   | 1 (3.13)  | 0 (0)    |                      |
| Visit 6 (Week 16)       | 27 (84.38)  | 1 (3.13)    | 0 (0)     | 0 (0)     | 0 (0)        | 3 (9.38)   | 1 (3.13)  | 0 (0)    |                      |
| Visit 7 (Week 20)       | 29 (90.63)  | 0 (0)       | 0 (0)     | 0 (0)     | 0 (0)        | 2 (6.25)   | 1 (3.13)  | 0 (0)    |                      |
| <b>Group*Time point</b> |             |             |           |           |              |            |           |          |                      |
| Visit 1 (Screening)     | Propranolol | 11 (64.71)  | 2 (11.76) | 2 (11.76) | 0 (0)        | 1 (5.88)   | 1 (5.88)  | 0 (0)    | 0 (0)                |
|                         | Steroid     | 14 (82.35)  | 0 (0)     | 1 (5.88)  | 1 (5.88)     | 0 (0)      | 0 (0)     | 1 (5.88) | 0 (0)                |
| Visit 2 (Week 1)        | Propranolol | 13 (76.47)  | 0 (0)     | 2 (11.76) | 0 (0)        | 1 (5.88)   | 1 (5.88)  | 0 (0)    | 0 (0)                |
|                         | Steroid     | 12 (80.00)  | 0 (0)     | 1 (6.67)  | 1 (6.67)     | 0 (0)      | 0 (0)     | 1 (6.67) | 0 (0)                |
| Visit 3 (Week 4)        | Propranolol | 14 (82.35)  | 0 (0)     | 0 (0)     | 0 (0)        | 0 (0)      | 2 (11.76) | 0 (0.00) | 1 (5.88)             |
|                         | Steroid     | 13 (86.67)  | 0 (0)     | 1 (6.67)  | 0 (0)        | 0 (0)      | 0 (0)     | 1 (6.67) | 0 (0)                |
| Visit 4 (Week 8)        | Propranolol | 13 (76.47)  | 1 (5.88)  | 1 (5.88)  | 0 (0)        | 0 (0)      | 2 (11.76) | 0 (0.00) | 0 (0)                |
|                         | Steroid     | 13 (86.67)  | 0 (0)     | 0 (0)     | 0 (0)        | 0 (0)      | 1 (6.67)  | 1 (6.67) | 0 (0)                |
| Visit 5 (Week 12)       | Propranolol | 14 (82.35)  | 1 (5.88)  | 0 (0)     | 0 (0)        | 0 (0)      | 2 (11.76) | 0 (0.00) | 0 (0)                |
|                         | Steroid     | 13 (86.67)  | 0 (0)     | 0 (0)     | 0 (0)        | 0 (0)      | 1 (6.67)  | 1 (6.67) | 0 (0)                |
| Visit 6 (Week 16)       | Propranolol | 14 (82.35)  | 1 (5.88)  | 0 (0)     | 0 (0)        | 0 (0)      | 2 (11.76) | 0 (0.00) | 0 (0)                |
|                         | Steroid     | 13 (86.67)  | 0 (0)     | 0 (0)     | 0 (0)        | 0 (0)      | 1 (6.67)  | 1 (6.67) | 0 (0)                |
| Visit 7 (Week 20)       | Propranolol | 15 (88.24)  | 0 (0)     | 0 (0)     | 0 (0)        | 0 (0)      | 2 (11.76) | 0 (0.00) | 0 (0)                |
|                         | Steroid     | 14 (93.33)  | 0 (0)     | 0 (0)     | 0 (0)        | 0 (0)      | 0 (0)     | 1 (6.67) | 0 (0)                |

<sup>1)</sup> GEE; effect of treatment

<sup>2)</sup> GEE; effect of time point

#### 4.2.4. Re-epithelization

The frequency and percentage of re-epithelization by group, time and group by time interaction are shown in eTable 21. There were 8 cases of re-epithelization in the propranolol group and 4 cases in the steroid group during the entire research period. Of the 34 total participants, re-epithelization occurred for 2 people (both in the propranolol group) during Visit 1 (screening). For Visits 1 (screening) and 2 (week 1), re-epithelization only occurred for participants in the propranolol group. Re-epithelization cases were observed in both groups for Visit 3 (Week 4), Visit 4 (Week 8), and Visit 5 (Week 12). In Visit 6 (Week 16), only the steroid group saw a case of re-epithelization. No cases of re-epithelization were observed in Visit 7 (Week 20).

Penalized maximum likelihood method was used to evaluate significance instead of GEE (generalized estimating equation) because using zero as the number of re-epithelization can cause inaccurate estimation.<sup>13</sup> The interaction (Group\*Time point) effect was not significant (P-value=0.8633) in evaluating the difference in the incidence of re-epithelization over time between the two groups. Furthermore, group (P-value=0.3169) and time point (P-value=0.9003) effects were all nonsignificant.

**eTable 21. Re-epithelization**

|                         | Re-epithelization |             | P-value                |
|-------------------------|-------------------|-------------|------------------------|
|                         | Yes               | No          |                        |
| <b>Group</b>            |                   |             |                        |
| Propranolol             | 8 (6.72)          | 111 (93.28) | 0.3169 <sup>1)a)</sup> |
| Steroid                 | 4 (3.74)          | 103 (96.26) |                        |
| <b>Time point</b>       |                   |             |                        |
| Visit 1 (Screening)     | 2 (5.88)          | 32 (94.12)  | 0.9003 <sup>2)a)</sup> |
| Visit 2 (Week 1)        | 2 (6.25)          | 30 (93.75)  |                        |
| Visit 3 (Week 4)        | 3 (9.38)          | 29 (90.63)  |                        |
| Visit 4 (Week 8)        | 2 (6.25)          | 30 (93.75)  |                        |
| Visit 5 (Week 12)       | 2 (6.25)          | 30 (93.75)  |                        |
| Visit 6 (Week 16)       | 1 (3.13)          | 31 (96.88)  |                        |
| Visit 7 (Week 20)       | 0 (0.00)          | 32 (100.00) |                        |
| <b>Group*Time point</b> |                   |             |                        |
| Visit 1 (Screening)     | Propranolol       | 2 (11.76)   | 15 (88.24)             |
|                         | Steroid           | 0 (0.00)    | 17 (100.00)            |
| Visit 2 (Week 1)        | Propranolol       | 2 (11.76)   | 15 (88.24)             |
|                         | Steroid           | 0 (0.00)    | 15 (100.00)            |
| Visit 3 (Week 4)        | Propranolol       | 2 (11.76)   | 15 (88.24)             |
|                         | Steroid           | 1 (6.67)    | 14 (93.33)             |
| Visit 4 (Week 8)        | Propranolol       | 1 (5.88)    | 16 (94.12)             |
|                         | Steroid           | 1 (6.67)    | 14 (93.33)             |
| Visit 5 (Week 12)       | Propranolol       | 1 (5.88)    | 16 (94.12)             |
|                         | Steroid           | 1 (6.67)    | 14 (93.33)             |
| Visit 6 (Week 16)       | Propranolol       | 0 (0.00)    | 17 (100.00)            |
|                         | Steroid           | 1 (6.67)    | 14 (93.33)             |
| Visit 7 (Week 20)       | Propranolol       | 0 (0.00)    | 17 (100.00)            |
|                         | Steroid           | 0 (0.00)    | 15 (100.00)            |

<sup>1)</sup> Logistic Regression; effect of treatment

<sup>2)</sup> Logistic Regression; effect of time

a: penalized likelihood was used to solve the separation problem(P-value and odds ratio can be inaccurately estimated because frequency is none or too low)

## **4.2.5 Ulceration**

### **4.1.5.1. Ulceration**

eTable 22 shows the frequency and percentage of ulceration presentation in patients according to group and time. During the entire duration of the clinical trial, there was one case of ulceration in the propranolol group and 2 cases in the steroid group. In Visit 1 (screening), ulceration was found in 2 out of 34 people, one per group. In Visit 2 (Week 1), there was one case from the steroid group. From Visit 3 (Week 3), no ulceration cases were observed. Results from penalized maximum likelihood method showed that interaction (Group\*Time point)(P-value=0.9987), group and time point effects were all non-significant.

**eTable 22. Ulceration**

|                         |             | Ulceration |             | P-value                |
|-------------------------|-------------|------------|-------------|------------------------|
|                         |             | Yes        | No          |                        |
| <b>Group</b>            |             |            |             |                        |
| Propranolol             |             | 1 (0.84)   | 118 (99.16) | 0.4868 <sup>1)a)</sup> |
| Steroid                 |             | 2 (1.87)   | 105 (98.13) |                        |
| <b>Time point</b>       |             |            |             |                        |
| Visit 1 (Screening)     |             | 2 (5.88)   | 32 (94.12)  | 0.7770 <sup>2)a)</sup> |
| Visit 2 (Week 1)        |             | 1 (3.13)   | 31 (96.88)  |                        |
| Visit 3 (Week 4)        |             | 0 (0.00)   | 32 (100.00) |                        |
| Visit 4 (Week 8)        |             | 0 (0.00)   | 32 (100.00) |                        |
| Visit 5 (Week 12)       |             | 0 (0.00)   | 32 (100.00) |                        |
| Visit 6 (Week 16)       |             | 0 (0.00)   | 32 (100.00) |                        |
| Visit 7 (Week 20)       |             | 0 (0.00)   | 32 (100.00) |                        |
| <b>Group*Time point</b> |             |            |             |                        |
| Visit 1 (Screening)     | Propranolol | 1 (5.88)   | 16 (94.12)  |                        |
|                         | Steroid     | 1 (5.88)   | 16 (94.12)  |                        |
| Visit 2 (Week 1)        | Propranolol | 0 (0.00)   | 17 (100.00) |                        |
|                         | Steroid     | 1 (6.67)   | 14 (93.33)  |                        |
| Visit 3 (Week 4)        | Propranolol | 0 (0.00)   | 17 (100.00) |                        |
|                         | Steroid     | 0 (0.00)   | 15 (100.00) |                        |
| Visit 4 (Week 8)        | Propranolol | 0 (0.00)   | 17 (100.00) |                        |
|                         | Steroid     | 0 (0.00)   | 15 (100.00) |                        |
| Visit 5 (Week 12)       | Propranolol | 0 (0.00)   | 17 (100.00) |                        |
|                         | Steroid     | 0 (0.00)   | 15 (100.00) |                        |
| Visit 6 (Week 16)       | Propranolol | 0 (0.00)   | 17 (100.00) |                        |
|                         | Steroid     | 0 (0.00)   | 15 (100.00) |                        |
| Visit 7 (Week 20)       | Propranolol | 0 (0.00)   | 17 (100.00) |                        |
|                         | Steroid     | 0 (0.00)   | 15 (100.00) |                        |

<sup>1)</sup> Logistic Regression; effect of treatment

<sup>2)</sup> Logistic Regression; effect of time

a: penalized likelihood was used to solve the separation problem(P-value and odds ratio can be inaccurately estimated because frequency is none or too low)



#### 4.2.5.2. Size of Ulceration

The mean, standard deviation and other descriptive statistics of the ulceration size for each group, time point, and group by time interaction are presented in eTable 23. If no ulceration was found, the size was recorded as “0”. From Visit 3 (Week 4), no ulceration cases were observed and the size was recorded as “0”.

The group by time interaction was not significant (P-value=0.5710, 0.3666, 0.5709), thus it cannot be said that there is a difference between the two groups in the change in ulceration size.

However, although controlling for time did not result in a statistically significant difference (P-value=0.9137, 0.5534, 0.7552), controlling for group did (P-value=0.5730, 0.3692, 0.7365). The average size of ulceration decreased over time, regardless of the group.

eTable 23. Size of Ulceration

|                     |                  | Ulceration       |                |                                 |           |
|---------------------|------------------|------------------|----------------|---------------------------------|-----------|
|                     |                  | Long axis(mm)    | Short axis(mm) | Surface area (mm <sup>2</sup> ) |           |
| Group               |                  |                  |                |                                 |           |
| Propranolol         | N                | 119              | 119            | 119                             |           |
|                     | Mean±S.D.        | 0.10±1.1         | 0.03±0.37      | 0.32±3.46                       |           |
|                     | Median[Min, Max] | 0[0,12]          | 0[0,4]         | 0[0,37.7]                       |           |
| Steroid             | N                | 107              | 107            | 107                             |           |
|                     | Mean±S.D.        | 0.13±0.95        | 0.10±0.78      | 0.57±4.27                       |           |
|                     | Median[Min, Max] | 0[0,7]           | 0[0,7]         | 0[0,38.5]                       |           |
| Time point          |                  |                  |                |                                 |           |
| Visit 1 (Screening) | N                | 34               | 34             | 34                              |           |
|                     | Mean±S.D.        | 0.56±2.35        | 0.32±1.36      | 2.24±9.1                        |           |
|                     | Median[Min, Max] | 0[0,12]          | 0[0,7]         | 0[0,38.5]                       |           |
| Visit 2 (Week 1)    | N                | 32               | 32             | 32                              |           |
|                     | Mean±S.D.        | 0.22±1.24        | 0.13±0.71      | 0.69±3.89                       |           |
|                     | Median[Min, Max] | 0[0,7]           | 0[0,4]         | 0[0,22]                         |           |
| Visit 3 (Week 4)    | N                | 32               | 32             | 32                              |           |
|                     | Mean±S.D.        | 0±0              | 0±0            | 0±0                             |           |
|                     | Median[Min, Max] | 0[0,0]           | 0[0,0]         | 0[0,0]                          |           |
| Visit 4 (Week 8)    | N                | 32               | 32             | 32                              |           |
|                     | Mean±S.D.        | 0±0              | 0±0            | 0±0                             |           |
|                     | Median[Min, Max] | 0[0,0]           | 0[0,0]         | 0[0,0]                          |           |
| Visit 5 (Week 12)   | N                | 32               | 32             | 32                              |           |
|                     | Mean±S.D.        | 0±0              | 0±0            | 0±0                             |           |
|                     | Median[Min, Max] | 0[0,0]           | 0[0,0]         | 0[0,0]                          |           |
| Visit 6 (Week 16)   | N                | 32               | 32             | 32                              |           |
|                     | Mean±S.D.        | 0±0              | 0±0            | 0±0                             |           |
|                     | Median[Min, Max] | 0[0,0]           | 0[0,0]         | 0[0,0]                          |           |
| Visit 7 (Week 20)   | N                | 32               | 32             | 32                              |           |
|                     | Mean±S.D.        | 0±0              | 0±0            | 0±0                             |           |
|                     | Median[Min, Max] | 0[0,0]           | 0[0,0]         | 0[0,0]                          |           |
| Group*Time point    |                  |                  |                |                                 |           |
| Visit 1 (Screening) | Propranolol      | N                | 17             | 17                              | 17        |
|                     |                  | Mean±S.D.        | 0.71±2.91      | 0.24±0.97                       | 2.22±9.14 |
|                     |                  | Median[Min, Max] | 0[0,12]        | 0[0,4]                          | 0[0,37.7] |
|                     | Steroid          | N                | 17             | 17                              | 17        |
|                     |                  | Mean±S.D.        | 0.41±1.7       | 0.41±1.7                        | 2.26±9.34 |

|                          |                    |                             |           |           |           |
|--------------------------|--------------------|-----------------------------|-----------|-----------|-----------|
|                          |                    | Median[Min, Max]            | 0[0,7]    | 0[0,7]    | 0[0,38.5] |
| <b>Visit 2 (Week 1)</b>  | <b>Propranolol</b> | N                           | 17        | 17        | 17        |
|                          |                    | Mean±S.D.                   | 0±0       | 0±0       | 0±0       |
|                          |                    | Median[Min, Max]            | 0[0,0]    | 0[0,0]    | 0[0,0]    |
|                          | <b>Steroid</b>     | N                           | 15        | 15        | 15        |
|                          |                    | Mean±S.D.                   | 0.47±1.81 | 0.27±1.03 | 1.47±5.68 |
|                          |                    | Median[Min, Max]            | 0[0,7]    | 0[0,4]    | 0[0,22]   |
| <b>Visit 3 (Week 4)</b>  | <b>Propranolol</b> | N                           | 17        | 17        | 17        |
|                          |                    | Mean±S.D.                   | 0±0       | 0±0       | 0±0       |
|                          |                    | Median[Min, Max]            | 0[0,0]    | 0[0,0]    | 0[0,0]    |
|                          | <b>Steroid</b>     | N                           | 15        | 15        | 15        |
|                          |                    | Mean±S.D.                   | 0±0       | 0±0       | 0±0       |
|                          |                    | Median[Min, Max]            | 0[0,0]    | 0[0,0]    | 0[0,0]    |
| <b>Visit 4 (Week 8)</b>  | <b>Propranolol</b> | N                           | 17        | 17        | 17        |
|                          |                    | Mean±S.D.                   | 0±0       | 0±0       | 0±0       |
|                          |                    | Median[Min, Max]            | 0[0,0]    | 0[0,0]    | 0[0,0]    |
|                          | <b>Steroid</b>     | N                           | 15        | 15        | 15        |
|                          |                    | Mean±S.D.                   | 0±0       | 0±0       | 0±0       |
|                          |                    | Median[Min, Max]            | 0[0,0]    | 0[0,0]    | 0[0,0]    |
| <b>Visit 5 (Week 12)</b> | <b>Propranolol</b> | N                           | 17        | 17        | 17        |
|                          |                    | Mean±S.D.                   | 0±0       | 0±0       | 0±0       |
|                          |                    | Median[Min, Max]            | 0[0,0]    | 0[0,0]    | 0[0,0]    |
|                          | <b>Steroid</b>     | N                           | 15        | 15        | 15        |
|                          |                    | Mean±S.D.                   | 0±0       | 0±0       | 0±0       |
|                          |                    | Median[Min, Max]            | 0[0,0]    | 0[0,0]    | 0[0,0]    |
| <b>Visit 6 (Week 16)</b> | <b>Propranolol</b> | N                           | 17        | 17        | 17        |
|                          |                    | Mean±S.D.                   | 0±0       | 0±0       | 0±0       |
|                          |                    | Median[Min, Max]            | 0[0,0]    | 0[0,0]    | 0[0,0]    |
|                          | <b>Steroid</b>     | N                           | 15        | 15        | 15        |
|                          |                    | Mean±S.D.                   | 0±0       | 0±0       | 0±0       |
|                          |                    | Median[Min, Max]            | 0[0,0]    | 0[0,0]    | 0[0,0]    |
| <b>Visit 7 (Week 20)</b> | <b>Propranolol</b> | N                           | 17        | 17        | 17        |
|                          |                    | Mean±S.D.                   | 0±0       | 0±0       | 0±0       |
|                          |                    | Median[Min, Max]            | 0[0,0]    | 0[0,0]    | 0[0,0]    |
|                          | <b>Steroid</b>     | N                           | 15        | 15        | 15        |
|                          |                    | Mean±S.D.                   | 0±0       | 0±0       | 0±0       |
|                          |                    | Median[Min, Max]            | 0[0,0]    | 0[0,0]    | 0[0,0]    |
|                          | <b>Group</b>       | <b>P-value<sup>1)</sup></b> | 0.9137    | 0.5534    | 0.7552    |
|                          | <b>Time point</b>  | <b>P-value<sup>2)</sup></b> | 0.5730    | 0.3692    | 0.7365    |

SD denotes standard deviation.

- 1) P-value according to GEE; effect of treatment
- 2) P-value according to GEE; effect of time point

**Figure 1.** Secondary efficacy variables. There was no significant difference between the treatment groups and time in other secondary efficacy evaluations such as hemangioma color, the presence of re-epithelization, the presence of ulceration, the size of ulceration, and medication administration ( $P > 0.05$ )

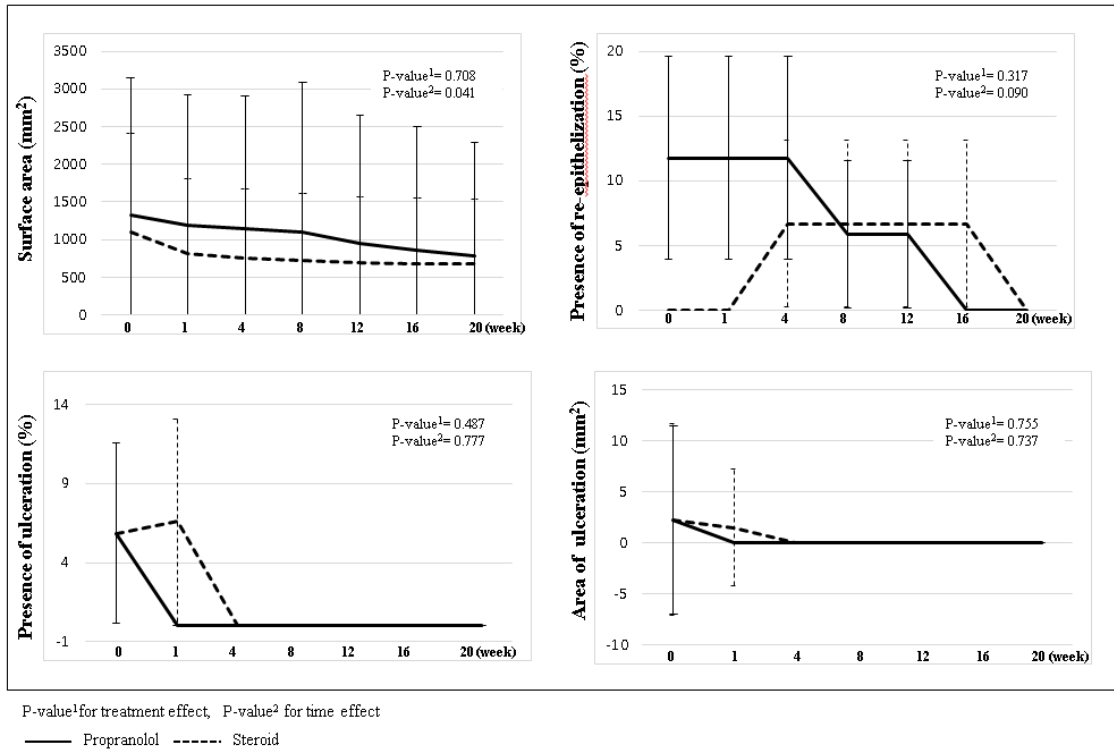

#### 4.2.6. The Time of Reaching Proliferative Stop and Regression

The median time and range of the time for reaching proliferative stop or regression after steroid or propranolol medication is presented in eTable 24. In addition, the frequency and percentage of subjects who experienced a proliferative stop or regression were calculated. The log rank test was conducted to determine the significance of the difference in time point for showing proliferative stop or regression between the steroid group and propranolol group. The time of reaching proliferative stop or regression is defined as the difference between the day at proliferative stop or regression and the day of random assignment. The difference between the day of withdrawal and the day of random assignment was used in the case of withdrawn participants.

In the case of the propranolol group, in all 17 subjects proliferation stopped or a regression occurred. The median time it took to reach proliferative stop or regression was 12 days after random assignment. For the steroid group, 15 subjects out of 17 showed proliferative stop or regression, and the median time was 11 days after random assignment. Results from a log rank test showed that there was no difference between the two groups.

**eTable 24. The time of reaching proliferative stop or regression**

|                                                | <b>Propranolol<br/>(N=17)</b> | <b>Steroid<br/>(N=17)</b> | <b>P-value*</b> |
|------------------------------------------------|-------------------------------|---------------------------|-----------------|
| <b>Event(proliferative stop or regression)</b> | 17                            | 15                        | 0.3424          |
| <b>Censored</b>                                | 0                             | 2                         |                 |
| <b>- Median time(day)</b>                      | 12                            | 11                        |                 |
| <b>- 95% CI</b>                                | [11,15]                       | [10,14]                   |                 |

\* Log-rank test

CI denotes confidence interval.

When defining regression to be a decrease of at least 25% compared to Visit 1, 13 out of 17 subjects in the propranolol group experienced regression and the median time was 62 days after random assignment. For the steroid group, regression occurred for 9 out of 17 subjects and the median time was 120 days. Conducting a log rank test resulted in no difference between the two groups.

**eTable 25. The time of regression**

|                           | <b>Propranolol<br/>(N=17)</b> | <b>Steroid<br/>(N=17)</b> | <b>P-value*</b> |
|---------------------------|-------------------------------|---------------------------|-----------------|
| <b>Event(regression)</b>  | 13                            | 9                         | 0.5325          |
| <b>Censored</b>           | 4                             | 8                         |                 |
| <b>- Median time(day)</b> | 62                            | 120                       |                 |
| <b>- 95% CI</b>           | [25,155]                      | [15,-] <sup>1)</sup>      |                 |

\* Log-rank test

CI denotes confidence interval.

<sup>1)</sup> Upper bound was not estimated because of discontinuance of trial.

#### 4.2.7. Compliance

eTable 26 shows descriptive statistics including the mean and standard deviation of medication duration and outpatient visits. Medication duration is defined as the period between the day of visit and the day of next visit if patient answered “Yes” to “Administering medication as scheduled” questionnaire. If “No” was the answer, medication duration is defined as the period between the day of visit and the day patient stopped the medication and the sum of the periods was used in statistical analysis. The number of outpatient visits counts outpatient visits out of 7 scheduled visits.

In terms of medication administration, in Visit 2 (Week 1) all subjects from both groups were administered medication, but in Visit 3 (Week 4) four subjects from the propranolol group and one from the steroid group did not take medication. For the remaining visits, there was a subject who did not take medication. Furthermore, excluding Visit 2 (Week 1), for each visit the number of subjects who took medication was higher for the steroid group than the propranolol group. When time point was controlled for, there was no statistically significant difference at the 5% level between the two groups in terms of medical administration (P-value=0.0566). In addition, there was also no difference in terms of total medication duration and outpatient visits (P-value=0.4375, 0.1633).



**eTable 26. Compliance**

|                                    |     | <b>Propranolol<br/>(N=17)</b> | <b>Steroid<br/>(N=17)</b> | <b>P-value</b>       |
|------------------------------------|-----|-------------------------------|---------------------------|----------------------|
| <b>Medication</b>                  |     |                               |                           |                      |
| Visit 2 (Week 1)                   | Yes | 17 (100.00)                   | 15 (100.00)               | 0.0566 <sup>2)</sup> |
|                                    | No  | 0 (0)                         | 0 (0)                     |                      |
| Visit 3 (Week 4)                   | Yes | 13 (76.47)                    | 14 (93.33)                |                      |
|                                    | No  | 4 (23.53)                     | 1 (6.67)                  |                      |
| Visit 4 (Week 8)                   | Yes | 10 (58.82)                    | 11 (73.33)                |                      |
|                                    | No  | 7 (41.18)                     | 4 (26.67)                 |                      |
| Visit 5 (Week 12)                  | Yes | 10 (58.82)                    | 11 (73.33)                |                      |
|                                    | No  | 7 (41.18)                     | 4 (26.67)                 |                      |
| Visit 6 (Week 16)                  | Yes | 8 (47.06)                     | 9 (60.00)                 |                      |
|                                    | No  | 9 (52.94)                     | 6 (40.00)                 |                      |
| Visit 7 (Week 20)                  | Yes | 9 (52.94)                     | 10 (66.67)                |                      |
|                                    | No  | 8 (47.06)                     | 5 (33.33)                 |                      |
| <b>Medication duration</b>         |     |                               |                           |                      |
| N                                  |     | 17                            | 15                        | 0.4375††             |
| Mean±S.D.                          |     | 120.29±24.99                  | 128.53±25.86              |                      |
| Median[Min, Max]                   |     | 123[64,154]                   | 147[82,151]               |                      |
| <b>Number of outpatient visits</b> |     |                               |                           |                      |
| N                                  |     | 17                            | 17                        | 0.1633††             |
| Mean±S.D.                          |     | 7.00±0.00                     | 6.29±1.99                 |                      |
| Median[Min, Max]                   |     | 7[7,7]                        | 7[1,7]                    |                      |

† Independent T-test, †† Wilcoxon Rank Sum test

SD denotes standard deviation.

<sup>1)</sup> Excluded from analysis if patient did not take the medication or did not remember the day of stop.

<sup>2)</sup> As there is no case for “administration medication in schedule =No” at Visit 2 (Week 1), logistic regression was used considering that all data are independent. (Interaction (Group \* Time point) was not significant but time effect was significant when group was controlled for (P-value=0.0226)).

## **5. Results of Safety Evaluation**

In the steroid group, after random assignment there was one subject (S025) who did not have at least one safety assessment completed. Safety analysis was conducted for the remaining 33 people (safety population).

During the duration of the clinical test, the number and percentage of participants who experienced at least one adverse reaction was recorded for each adverse reaction and separated by group. Information regarding the extent of adverse reaction, result, causality, and related measures was also arranged by group. In addition, for each group the side effect category and rate of incidence was calculated. In the case of vital signs, glucose level (BST), and safety evaluation categories (decreased heart rate, low blood sugar, low blood pressure, etc.), which were measured one hour after injection, descriptive statistics were used to summarize the data.

### **5.1. Complications**

Results from observing complications after drug injection for both groups showed that the frequency for hypertension was highest for most visits. In Visit 2 (Week 1), there were 0 cases of other complications for the propranolol group and 5 cases for the steroid group. With a P-value of 0.0149, the incidence rate difference between the two groups was statistically significant. In Visit 4 (Week 8), there were 0 cases of facial edema for the propranolol group and 5 cases for the steroid group. Thus, the P-value (0.0149) also indicated a statistically significant difference between the two groups. In Visit 6 (Week 16), the number of cases for all complications was 5 for the propranolol group and 10 for the steroid group. The difference was statistically significant.

**eTable 27. Complications**

|                                           | Propranolol (N=17) <sup>2)</sup> |             | Steroid (N=16) <sup>2)</sup> |             | P-value  |
|-------------------------------------------|----------------------------------|-------------|------------------------------|-------------|----------|
|                                           | Yes                              | No          | Yes                          | No          |          |
| <b>Duration of admission<sup>3)</sup></b> |                                  |             |                              |             |          |
| Decreased heart rate                      | 0 (0)                            | 17 (100.00) | -                            | -           | -        |
| Low blood pressure                        | 1 (5.88)                         | 16 (94.12)  | -                            | -           | -        |
| Hypoglycemia                              | 0 (0)                            | 17 (100.00) | -                            | -           | -        |
| Trouble breathing                         | 0 (0)                            | 17 (100.00) | -                            | -           | -        |
| Facial edema                              | 0 (0)                            | 17 (100.00) | -                            | -           | -        |
| Gastroesophageal reflux                   | 0 (0)                            | 17 (100.00) | -                            | -           | -        |
| Hypertension                              | 6 (35.29)                        | 11 (64.71)  | -                            | -           | -        |
| Growth disability                         | 0 (0)                            | 17 (100.00) | -                            | -           | -        |
| Others <sup>1)</sup>                      | 6 (35.29)                        | 11 (64.71)  | -                            | -           | -        |
| None                                      | 6 (35.29)                        | 11 (64.71)  | -                            | -           | -        |
| <b>Visit 2 (Week 1)</b>                   |                                  |             |                              |             |          |
| Decreased heart rate                      | 0 (0)                            | 17 (100.00) | 0 (0)                        | 15 (100.00) | -        |
| Low blood pressure                        | 1 (5.88)                         | 16 (94.12)  | 0 (0)                        | 15 (100.00) | 1.0000** |
| Hypoglycemia                              | 0 (0)                            | 17 (100.00) | 0 (0)                        | 15 (100.00) | -        |
| Trouble breathing                         | 0 (0)                            | 17 (100.00) | 0 (0)                        | 15 (100.00) | -        |
| Facial edema                              | 0 (0)                            | 17 (100.00) | 0 (0)                        | 15 (100.00) | -        |
| Gastroesophageal reflux                   | 0 (0)                            | 17 (100.00) | 0 (0)                        | 15 (100.00) | -        |
| Hypertension                              | 1 (5.88)                         | 16 (94.12)  | 1 (6.67)                     | 14 (93.33)  | 1.0000** |
| Growth disability                         | 0 (0)                            | 17 (100.00) | 0 (0)                        | 15 (100.00) | -        |
| Others <sup>1)</sup>                      | 0 (0.00)                         | 17 (100.00) | 5 (33.33)                    | 10 (66.67)  | 0.0149** |
| None                                      | 15 (88.24)                       | 2 (11.76)   | 10 (66.67)                   | 5 (33.33)   | 0.2095** |
| <b>Visit 3 (Week 4)</b>                   |                                  |             |                              |             |          |
| Decreased heart rate                      | 0 (0)                            | 17 (100.00) | 0 (0)                        | 15 (100.00) | -        |
| Low blood pressure                        | 1 (5.88)                         | 16 (94.12)  | 0 (0)                        | 15 (100.00) | 1.0000** |
| Hypoglycemia                              | 0 (0)                            | 17 (100.00) | 0 (0)                        | 15 (100.00) | -        |
| Trouble breathing                         | 0 (0)                            | 17 (100.00) | 0 (0)                        | 15 (100.00) | -        |
| Facial edema                              | 0 (0)                            | 17 (100.00) | 1 (6.67)                     | 14 (93.33)  | 0.4688** |
| Gastroesophageal reflux                   | 0 (0)                            | 17 (100.00) | 0 (0)                        | 15 (100.00) | -        |
| Hypertension                              | 2 (11.76)                        | 15 (88.24)  | 3 (20.00)                    | 12 (80.00)  | 0.6454** |
| Growth disability                         | 0 (0)                            | 17 (100.00) | 0 (0)                        | 15 (100.00) | -        |
| Others <sup>1)</sup>                      | 9 (52.94)                        | 8 (47.06)   | 8 (53.33)                    | 7 (46.67)   | 0.9823*  |
| None                                      | 7 (41.18)                        | 10 (58.82)  | 3 (20.00)                    | 12 (80.00)  | 0.2654** |
| <b>Visit 4 (Week 8)</b>                   |                                  |             |                              |             |          |
| Decreased heart rate                      | 0 (0)                            | 17 (100.00) | 0 (0)                        | 15 (100.00) | -        |
| Low blood pressure                        | 1 (5.88)                         | 16 (94.12)  | 0 (0)                        | 15 (100.00) | 1.0000** |

|                          |            |             |           |             |          |
|--------------------------|------------|-------------|-----------|-------------|----------|
| Hypoglycemia             | 0 (0)      | 17 (100.00) | 0 (0)     | 15 (100.00) | -        |
| Trouble breathing        | 0 (0)      | 17 (100.00) | 0 (0)     | 15 (100.00) | -        |
| Facial edema             | 0 (0)      | 17 (100.00) | 5 (33.33) | 10 (66.67)  | 0.0149** |
| Gastroesophageal reflux  | 0 (0)      | 17 (100.00) | 0 (0)     | 15 (100.00) | -        |
| Hypertension             | 0 (0)      | 17 (100.00) | 2 (13.33) | 13 (86.67)  | 0.2117** |
| Growth disability        | 0 (0)      | 17 (100.00) | 0 (0)     | 15 (100.00) | -        |
| Others <sup>1)</sup>     | 8 (47.06)  | 9 (52.94)   | 7 (46.67) | 8 (53.33)   | 0.9823*  |
| None                     | 9 (52.94)  | 8 (47.06)   | 4 (26.67) | 11 (73.33)  | 0.1310*  |
| <b>Visit 5 (Week 12)</b> |            |             |           |             |          |
| Decreased heart rate     | 0 (0)      | 17 (100.00) | 0 (0)     | 15 (100.00) | -        |
| Low blood pressure       | 1 (5.88)   | 16 (94.12)  | 0 (0)     | 15 (100.00) | 1.0000** |
| Hypoglycemia             | 0 (0)      | 17 (100.00) | 0 (0)     | 15 (100.00) | -        |
| Trouble breathing        | 0 (0)      | 17 (100.00) | 0 (0)     | 15 (100.00) | -        |
| Facial edema             | 0 (0)      | 17 (100.00) | 0 (0)     | 15 (100.00) | -        |
| Gastroesophageal reflux  | 0 (0)      | 17 (100.00) | 0 (0)     | 15 (100.00) | -        |
| Hypertension             | 1 (5.88)   | 16 (94.12)  | 3 (20.00) | 12 (80.00)  | 0.3192** |
| Growth disability        | 0 (0)      | 17 (100.00) | 0 (0)     | 15 (100.00) | -        |
| Others <sup>1)</sup>     | 8 (47.06)  | 9 (52.94)   | 7 (46.67) | 8 (53.33)   | 0.9823*  |
| None                     | 8 (47.06)  | 9 (52.94)   | 7 (46.67) | 8 (53.33)   | 0.9823*  |
| <b>Visit 6 (Week 16)</b> |            |             |           |             |          |
| Decreased heart rate     | 0 (0)      | 17 (100.00) | 0 (0)     | 15 (100.00) | -        |
| Low blood pressure       | 0 (0)      | 17 (100.00) | 1 (6.67)  | 14 (93.33)  | 0.4688** |
| Hypoglycemia             | 0 (0)      | 17 (100.00) | 0 (0)     | 15 (100.00) | -        |
| Trouble breathing        | 0 (0)      | 17 (100.00) | 0 (0)     | 15 (100.00) | -        |
| Facial edema             | 0 (0)      | 17 (100.00) | 0 (0)     | 15 (100.00) | -        |
| Gastroesophageal reflux  | 0 (0)      | 17 (100.00) | 0 (0)     | 15 (100.00) | -        |
| Hypertension             | 2 (11.76)  | 15 (88.24)  | 4 (26.67) | 11 (73.33)  | 0.3828** |
| Growth disability        | 0 (0.00)   | 17 (100.00) | 1 (6.67)  | 14 (93.33)  | 0.4688** |
| Others <sup>1)</sup>     | 4 (23.53)  | 13 (76.47)  | 7 (46.67) | 8 (53.33)   | 0.1691*  |
| None                     | 12 (70.59) | 5 (29.41)   | 5 (33.33) | 10 (66.67)  | 0.0351*  |
| <b>Visit 7 (Week 20)</b> |            |             |           |             |          |
| Decreased heart rate     | 0 (0)      | 17 (100.00) | 0 (0)     | 15 (100.00) | -        |
| Low blood pressure       | 0 (0)      | 17 (100.00) | 0 (0)     | 15 (100.00) | -        |
| Hypoglycemia             | 0 (0)      | 17 (100.00) | 0 (0)     | 15 (100.00) | -        |
| Trouble breathing        | 0 (0)      | 17 (100.00) | 0 (0)     | 15 (100.00) | -        |
| Facial edema             | 0 (0)      | 17 (100.00) | 0 (0)     | 15 (100.00) | -        |
| Gastroesophageal reflux  | 0 (0)      | 17 (100.00) | 0 (0)     | 15 (100.00) | -        |
| Hypertension             | 0 (0)      | 17 (100.00) | 3 (20.00) | 12 (80.00)  | 0.0917** |

|                      |            |             |           |            |          |
|----------------------|------------|-------------|-----------|------------|----------|
| Growth disability    | 0 (0)      | 17 (100.00) | 1 (6.67)  | 14 (93.33) | 0.4688** |
| Others <sup>1)</sup> | 11 (64.71) | 6 (35.29)   | 5 (33.33) | 10 (66.67) | 0.0765*  |
| None                 | 6 (35.29)  | 11 (64.71)  | 8 (53.33) | 7 (46.67)  | 0.3047*  |

\* Chi-square test, \*\* Fisher's Exact test

<sup>1)</sup> Details were presented for adverse reaction.

<sup>2)</sup> Overwriting available.

<sup>3)</sup> Only patients in the propranolol group were admitted.

## **5.2. Adverse Reactions**

The number of subjects who had at least one adverse reaction was 31 (16 from experimental group, 15 from control group) out of a total of 33. In terms of cases by group, in the experimental group there was 70 cases across 16 patients and in the control group there was 60 cases across 15 patients. No serious adverse events occurred. The adverse events that occurred mostly had little to no relevance to the drug administered, and most have recovered or are in the process of recovering.

**eTable 28. Summary of adverse reaction reported during the duration of the trial**

|                                                                      | <b>Propranolol<br/>(N=17)</b> | <b>Steroid<br/>(N=16)</b> | <b>P-value</b> |
|----------------------------------------------------------------------|-------------------------------|---------------------------|----------------|
| <b>Adverse Reaction</b>                                              |                               |                           |                |
| The number of subjects who had at least one adverse reaction         | 16 (94.12)                    | 15 (93.75)                | 1.0000**       |
| The number of adverse reactions                                      | 70                            | 60                        |                |
| <b>Serious Adverse Reaction</b>                                      |                               |                           |                |
| The number of subjects who had at least one serious adverse reaction | 0 (0)                         | 0 (0)                     | -              |
| The number of serious adverse reactions                              | 0                             | 0                         |                |
| <b>Causality</b>                                                     |                               |                           |                |
| 1= Certain                                                           | 0 (0)                         | 0 (0)                     |                |
| 2= Probable/likely                                                   | 0 (0)                         | 0 (0)                     |                |
| 3= Possible                                                          | 10 (14.29)                    | 24 (40.00)                |                |
| 4= Unlikely                                                          | 56 (80.00)                    | 35 (58.33)                |                |
| 5= Probably not related                                              | 4 (5.71)                      | 1 (1.67)                  |                |
| 6= Unassessable/unclassifiable                                       | 0 (0)                         | 0 (0)                     |                |
| <b>Action after adverse reaction</b>                                 |                               |                           |                |
| 1=None                                                               | 22 (31.43)                    | 29 (48.33)                |                |
| 2=Dose reduction                                                     | 0 (0)                         | 0 (0)                     |                |
| 3=Addition medication for adverse reaction                           | 48 (68.57)                    | 27 (45.00)                |                |
| 4=non-pharmaceutical treatment                                       | 0 (0)                         | 2 (3.33)                  |                |
| 5=Stop applying medication                                           | 0 (0)                         | 2 (3.33)                  |                |
| 6=Not applicable                                                     | 0 (0)                         | 0 (0)                     |                |
| <b>Results</b>                                                       |                               |                           |                |
| 1= Recovered                                                         | 54 (77.14)                    | 46 (76.67)                |                |
| 2= Not recovered                                                     | 0 (0)                         | 2 (3.33)                  |                |
| 3= Recovering                                                        | 16 (22.86)                    | 11 (18.33)                |                |
| 4= Death                                                             | 0 (0)                         | 0 (0)                     |                |
| 5=Lost to follow up                                                  | 0 (0)                         | 0 (0)                     |                |
| 6=Unknown                                                            | 0 (0)                         | 1 (1.67)                  |                |

\* Chi-square test, \*\* Fisher's Exact test

The eTable 29 is the chart for adverse reactions during the duration of trials for the two groups. The most common adverse event for both the propranolol group and the steroid group was nasopharyngitis, which occurred in 13 patients (21 cases) in the propranolol group and in 8 patients (14 cases) in the steroid group. In terms of number of subjects, the Dermatitis atopic (total 10 patients, 7 in propranolol and 3 in steroid) and Diarrhea (total 10 patients, 6 in propranolol and 4 in steroid) were the next most common adverse reactions.



**eTable 29. Chart of adverse reactions during the duration of trials**

| Adverse reaction                                     |                             | Number of subject     |                   | Number                |                   |
|------------------------------------------------------|-----------------------------|-----------------------|-------------------|-----------------------|-------------------|
|                                                      |                             | Propranolol<br>(N=17) | Steroid<br>(N=16) | Propranolol<br>(N=70) | Steroid<br>(N=60) |
| System Organ Class                                   | Preferred Term              |                       |                   |                       |                   |
| Eye disorders                                        | Eye discharge               | 2 (11.76)             | 0 (0)             | 2 (2.86)              | 0 (0)             |
| Gastrointestinal disorders                           | Constipation                | 1 (5.88)              | 3 (18.75)         | 1 (1.43)              | 3 (5.00)          |
|                                                      | Diarrhea                    | 6 (35.29)             | 4 (25.00)         | 8 (11.43)             | 6 (10.00)         |
|                                                      | Dyspepsia                   | 0 (0)                 | 1 (6.25)          | 0 (0)                 | 1 (1.67)          |
|                                                      | Vomiting                    | 4 (23.53)             | 6 (37.5)          | 4 (5.71)              | 6 (10.00)         |
| General disorders and administration site conditions | Fatigue                     | 1 (5.88)              | 0 (0)             | 1 (1.43)              | 0 (0)             |
|                                                      | Pyrexia                     | 4 (23.53)             | 2 (12.5)          | 6 (8.57)              | 2 (3.33)          |
| Infections and infestations                          | Abscess limb                | 1 (5.88)              | 0 (0)             | 1 (1.43)              | 0 (0)             |
|                                                      | Abscess oral                | 0 (0)                 | 1 (6.25)          | 0 (0)                 | 1 (1.67)          |
|                                                      | Bronchiolitis               | 1 (5.88)              | 0 (0)             | 1 (1.43)              | 0 (0)             |
|                                                      | Hand-foot-and-mouth disease | 1 (5.88)              | 0 (0)             | 1 (1.43)              | 0 (0)             |
|                                                      | Intertrigo candida          | 1 (5.88)              | 0 (0)             | 1 (1.43)              | 0 (0)             |
|                                                      | Nasopharyngitis             | 13 (76.47)            | 8 (50)            | 21 (30)               | 14 (23.33)        |
|                                                      | Otitis media                | 1 (5.88)              | 2 (12.5)          | 1 (1.43)              | 2 (3.33)          |
|                                                      | Pharyngitis                 | 1 (5.88)              | 0 (0)             | 1 (1.43)              | 0 (0)             |
|                                                      | Pneumonia                   | 0 (0)                 | 1 (6.25)          | 0 (0)                 | 1 (1.67)          |
| Urinary tract infection                              | 1 (5.88)                    | 1 (6.25)              | 1 (1.43)          | 1 (1.67)              |                   |
| Injury, poisoning and procedural complications       | Excoriation                 | 1 (5.88)              | 1 (6.25)          | 1 (1.43)              | 1 (1.67)          |
| Metabolism and nutrition disorders                   | Hyperglycemia               | 0 (0)                 | 1 (6.25)          | 0 (0)                 | 1 (1.67)          |
|                                                      | Hypophagia                  | 1 (5.88)              | 0 (0)             | 1 (1.43)              | 0 (0)             |
| Nervous system disorders                             | Burning sensation           | 0 (0)                 | 1 (6.25)          | 0 (0)                 | 1 (1.67)          |
| Psychiatric disorders                                | Agitation neonatal          | 0 (0)                 | 4 (25)            | 0 (0)                 | 4 (6.67)          |
|                                                      | Bulimia nervosa             | 0 (0)                 | 1 (6.25)          | 0 (0)                 | 1 (1.67)          |
|                                                      | Insomnia                    | 1 (5.88)              | 4 (25)            | 1 (1.43)              | 5 (8.33)          |
| Respiratory, thoracic and mediastinal disorders      | Epistaxis                   | 1 (5.88)              | 0 (0)             | 1 (1.43)              | 0 (0)             |
|                                                      | Rhinorrhea                  | 0 (0)                 | 1 (6.25)          | 0 (0)                 | 1 (1.67)          |
| Skin and subcutaneous tissue disorders               | Acne infantile              | 1 (5.88)              | 0 (0)             | 1 (1.43)              | 0 (0)             |
|                                                      | Alopecia                    | 0 (0)                 | 1 (6.25)          | 0 (0)                 | 1 (1.67)          |
|                                                      | Dermatitis allergic         | 0 (0)                 | 1 (6.25)          | 0 (0)                 | 1 (1.67)          |
|                                                      | Dermatitis atopic           | 7 (41.18)             | 3 (18.75)         | 7 (10.00)             | 3 (5.00)          |
|                                                      | Dermatitis diaper           | 0 (0)                 | 1 (6.25)          | 0 (0)                 | 1 (1.67)          |
|                                                      | Eczema                      | 1 (5.88)              | 0 (0)             | 1 (1.43)              | 0 (0)             |
| Heat rash                                            | 1 (5.88)                    | 0 (0)                 | 1 (1.43)          | 0 (0)                 |                   |

|  |            |           |          |          |          |
|--|------------|-----------|----------|----------|----------|
|  | Intertrigo | 1 (5.88)  | 0 (0)    | 1 (1.43) | 0 (0)    |
|  | Milia      | 1 (5.88)  | 0 (0)    | 1 (1.43) | 0 (0)    |
|  | Papule     | 2 (11.76) | 0 (0)    | 2 (2.86) | 0 (0)    |
|  | Rash       | 1 (5.88)  | 2 (12.5) | 1 (1.43) | 2 (3.33) |
|  | Urticaria  | 1 (5.88)  | 1 (6.25) | 1 (1.43) | 1 (1.67) |

### 5.3. Vital Signs and Glucose level (Blood sugar test)

Vital signs and glucose level (BST) at one hour after injection in test group are shown in eTable 30.

**eTable 30. Vital signs and glucose level – Test group**

|                                        |                |                               | N  | Propranolol<br>(N=17)        |
|----------------------------------------|----------------|-------------------------------|----|------------------------------|
| <b>Systolic blood pressure (mmHG)</b>  |                |                               |    |                              |
| <b>Day 1</b>                           | <b>Midday</b>  | Mean±S.D.<br>Median[Min, Max] | 17 | 97.59±16.5<br>100[71,130]    |
|                                        | <b>Evening</b> | Mean±S.D.<br>Median[Min, Max] | 17 | 94.59±14.22<br>94[70,126]    |
| <b>Day 2</b>                           | <b>Morning</b> | Mean±S.D.<br>Median[Min, Max] | 17 | 97.65±15.05<br>97[76,128]    |
|                                        | <b>Midday</b>  | Mean±S.D.<br>Median[Min, Max] | 17 | 93.94±14.35<br>88[67,121]    |
|                                        | <b>Evening</b> | Mean±S.D.<br>Median[Min, Max] | 17 | 89.12±14.73<br>86[68,119]    |
| <b>Day 3</b>                           | <b>Morning</b> | Mean±S.D.<br>Median[Min, Max] | 17 | 93.82±9.83<br>91[81,114]     |
| <b>Diastolic blood pressure (mmHG)</b> |                |                               |    |                              |
| <b>Day 1</b>                           | <b>Midday</b>  | Mean±S.D.<br>Median[Min, Max] | 17 | 47.12±8.12<br>48[31,60]      |
|                                        | <b>Evening</b> | Mean±S.D.<br>Median[Min, Max] | 17 | 45.88±12.14<br>44[24,72]     |
| <b>Day 2</b>                           | <b>Morning</b> | Mean±S.D.<br>Median[Min, Max] | 17 | 49.94±10.28<br>47[26,66]     |
|                                        | <b>Midday</b>  | Mean±S.D.<br>Median[Min, Max] | 17 | 46.18±11.04<br>45[34,72]     |
|                                        | <b>Evening</b> | Mean±S.D.<br>Median[Min, Max] | 17 | 44.41±9.35<br>43[34,74]      |
| <b>Day 3</b>                           | <b>Morning</b> | Mean±S.D.<br>Median[Min, Max] | 17 | 44.35±6.94<br>43[30,57]      |
| <b>Heart rate (/min)</b>               |                |                               |    |                              |
| <b>Day 1</b>                           | <b>Midday</b>  | Mean±S.D.<br>Median[Min, Max] | 17 | 131.88±9.45<br>130[117,158]  |
|                                        | <b>Evening</b> | Mean±S.D.<br>Median[Min, Max] | 17 | 126.41±15.54<br>128[97,150]  |
| <b>Day 2</b>                           | <b>Morning</b> | Mean±S.D.<br>Median[Min, Max] | 17 | 128.06±11.04<br>126[117,155] |

|                                 |                |                               |    |                               |
|---------------------------------|----------------|-------------------------------|----|-------------------------------|
|                                 | <b>Midday</b>  | Mean±S.D.<br>Median[Min, Max] | 17 | 122.88±11.19<br>125[102,138]  |
|                                 | <b>Evening</b> | Mean±S.D.<br>Median[Min, Max] | 17 | 122.47±17.39<br>118[100,163]  |
| <b>Day 3</b>                    | <b>Morning</b> | Mean±S.D.<br>Median[Min, Max] | 17 | 123.47±12.49<br>120[102,154]  |
| <b>Respiratory rate (/min)</b>  |                |                               |    |                               |
| <b>Day 1</b>                    | <b>Midday</b>  | Mean±S.D.<br>Median[Min, Max] | 17 | 35.29±5.24<br>36[24,44]       |
|                                 | <b>Evening</b> | Mean±S.D.<br>Median[Min, Max] | 17 | 35.65±5.8<br>36[26,48]        |
| <b>Day 2</b>                    | <b>Morning</b> | Mean±S.D.<br>Median[Min, Max] | 17 | 38.59±7.51<br>38[30,60]       |
|                                 | <b>Midday</b>  | Mean±S.D.<br>Median[Min, Max] | 17 | 37.06±7.49<br>36[28,58]       |
|                                 | <b>Evening</b> | Mean±S.D.<br>Median[Min, Max] | 17 | 38.71±7.58<br>40[30,52]       |
| <b>Day 3</b>                    | <b>Morning</b> | Mean±S.D.<br>Median[Min, Max] | 17 | 36.35±6.09<br>36[26,48]       |
| <b>Body temperature (°C)</b>    |                |                               |    |                               |
| <b>Day 1</b>                    | <b>Midday</b>  | Mean±S.D.<br>Median[Min, Max] | 17 | 36.66±0.43<br>36.7[36,37.4]   |
|                                 | <b>Evening</b> | Mean±S.D.<br>Median[Min, Max] | 17 | 36.81±0.37<br>36.8[36,37.7]   |
| <b>Day 2</b>                    | <b>Morning</b> | Mean±S.D.<br>Median[Min, Max] | 17 | 36.69±0.31<br>36.7[36,37.4]   |
|                                 | <b>Midday</b>  | Mean±S.D.<br>Median[Min, Max] | 17 | 36.75±0.42<br>36.8[36.1,37.5] |
|                                 | <b>Evening</b> | Mean±S.D.<br>Median[Min, Max] | 17 | 36.62±0.26<br>36.6[36.2,37]   |
| <b>Day 3</b>                    | <b>Morning</b> | Mean±S.D.<br>Median[Min, Max] | 17 | 36.86±0.39<br>36.7[36.3,37.7] |
| <b>Blood sugar test (mg/dL)</b> |                |                               |    |                               |
| <b>Day 1</b>                    | <b>Midday</b>  | Mean±S.D.<br>Median[Min, Max] | 17 | 103±13.44<br>102[86,142]      |
|                                 | <b>Evening</b> | Mean±S.D.<br>Median[Min, Max] | 17 | 101.76±12.59<br>102[71,123]   |
| <b>Day 2</b>                    | <b>Morning</b> | Mean±S.D.<br>Median[Min, Max] | 17 | 108.06±16.03<br>104[87,146]   |
|                                 | <b>Midday</b>  | Mean±S.D.                     | 17 | 102.18±11.6                   |

|              |                |                               |    |                            |
|--------------|----------------|-------------------------------|----|----------------------------|
|              |                | Median[Min, Max]              |    | 102[82,133]                |
|              | <b>Evening</b> | Mean±S.D.<br>Median[Min, Max] | 17 | 98.82±12.52<br>102[79,123] |
| <b>Day 3</b> | <b>Morning</b> | Mean±S.D.<br>Median[Min, Max] | 17 | 104.12±9.28<br>103[86,119] |

SD denotes standard deviation.

Vital signs and glucose level (BST) measured at 1 hour after injection for outpatients in the control group are shown in eTable 31.

**eTable 31. Vital signs and glucose level (BST)- Control group**

|                    |                               | N  | Steroid<br>(N=16)            |
|--------------------|-------------------------------|----|------------------------------|
| <b>SBP (mmHG)</b>  |                               |    |                              |
| <b>Initial</b>     | Mean±S.D.<br>Median[Min, Max] | 16 | 90.19±8.22<br>89.5[80,103]   |
| <b>DBP (mmHG)</b>  |                               |    |                              |
| <b>Initial</b>     | Mean±S.D.<br>Median[Min, Max] | 16 | 50.25±9.46<br>47.5[40,67]    |
| <b>HR (/min)</b>   |                               |    |                              |
| <b>Initial</b>     | Mean±S.D.<br>Median[Min, Max] | 16 | 147.63±14.02<br>148[124,171] |
| <b>RR (/min)</b>   |                               |    |                              |
| <b>Initial</b>     | Mean±S.D.<br>Median[Min, Max] | 16 | 35.88±2.87<br>36[30,40]      |
| <b>BT (°C)</b>     |                               |    |                              |
| <b>Initial</b>     | Mean±S.D.<br>Median[Min, Max] | 16 | 36.96±0.35<br>37[36,37.4]    |
| <b>BST (mg/dL)</b> |                               |    |                              |
| <b>Initial</b>     | Mean±S.D.<br>Median[Min, Max] | 15 | 121±18.7<br>120[87,149]      |

SBP denotes systolic blood pressure, SD standard deviation, DBP diastolic blood pressure, HR heart rate, RR respiratory rate, BT body temperature, BST blood sugar test.

**eTable 32. Vital signs and blood glucose level**

|            | level            | Propranolol   | Steroid      | p_value |
|------------|------------------|---------------|--------------|---------|
| <b>SBP</b> | N                | 17            | 16           | 0.113*  |
|            | Mean±SD          | 97.59±16.5    | 90.19±8.22   |         |
|            | Median[Min, Max] | 100[71,130]   | 89.5[80,103] |         |
| <b>DBP</b> | N                | 17            | 16           | 0.588*  |
|            | Mean±SD          | 47.12±8.12    | 50.25±9.46   |         |
|            | Median[Min, Max] | 48[31,60]     | 47.5[40,67]  |         |
| <b>HR</b>  | N                | 17            | 16           | 0.003*  |
|            | Mean±SD          | 131.88±9.45   | 147.63±14.02 |         |
|            | Median[Min, Max] | 130[117,158]  | 148[124,171] |         |
| <b>RR</b>  | N                | 17            | 16           | 0.8548* |
|            | Mean±SD          | 35.29±5.24    | 35.88±2.87   |         |
|            | Median[Min, Max] | 36[24,44]     | 36[30,40]    |         |
| <b>BT</b>  | N                | 17            | 16           | 0.036*  |
|            | Mean±SD          | 36.66±0.43    | 36.96±0.35   |         |
|            | Median[Min, Max] | 36.7[36,37.4] | 37[36,37.4]  |         |
| <b>BST</b> | N                | 17            | 15           | 0.0023* |
|            | Mean±SD          | 103±13.44     | 121±18.7     |         |
|            | Median[Min, Max] | 102[86,142]   | 120[87,149]  |         |

\* Wilcoxon Rank Sum test

SBP denotes systolic blood pressure, SD standard deviation, DBP diastolic blood pressure, HR heart rate, RR respiratory rate, BT body temperature, BST blood sugar test.

## 6. Conclusion

A total of 34 patients agreed and registered in this trial. The patients were randomly assigned to either the propranolol group (17 patients) or steroid group (17 patients). Trials were finished without any severe violation of protocol. The efficiency evaluation was conducted in the PP analysis group, which includes 30 target participants (propranolol group: steroid group = 16:14). The safety evaluation was conducted in safety population, which had a total of 33 patients (propranolol group: steroid group = 17:16).

In terms of demographics for the ITT group, the mean age for the 17 participants assigned to the propranolol group was 3.18 months, mean weight was 6.45kg, and mean height was 61.75cm. For the 17 participants assigned to the steroid group, the mean age was 2.65 months, mean weight was 6.02kg, and mean height was 60.51cm. In the propranolol group, 7 of the participants were male (41.18%), and in the steroid group, 8 were male (47.06%). All demographics were not statistically significant at the 5% level ( $P < 0.05$ ), thus it cannot be said that there was any statistical difference between the two groups.

It was found that there was no statistically significant difference in vital signs (systolic and diastolic blood pressure, heart rate, respiratory rate, and body temperature) between the two groups. In addition, no abnormalities were found in the chest radiograph image, electrocardiograph, cardiac, and echocardiograph results of any of the patients, thus there was no statistical difference between the two groups.

In the steroid group, for the blood chemistry categories total bilirubin, alkaline phosphatase, and potassium, several patients had abnormal values: 3 for total bilirubin, 2 for alkaline phosphatase, and 2 for potassium. One patient showed an abnormal value of positive for the urinalysis category NIR. No patient showed abnormal values for any of the other inspections.

In the propranolol group, none of the patients showed abnormal values for any of the test categories. Excluding alkaline phosphatase, we found no significant difference in blood test or urinalysis results at the 5% level. In the case of alkaline phosphatase, the propranolol group mean was 257.18 IU/L, and the steroid group mean was 315.82 IU/L. Although the steroid group had a higher mean, there was no significant difference.

The baseline hemangioma inspection results for both groups are as follows. The mean age (calculated by the age at diagnosis) for the propranolol group was 108.76 days and for the steroid group was 89.24 days. For both groups, the face was the most common location of hemangioma (10 cases for propranolol and 13 for steroid). MRI scans (or ultrasound examinations) were conducted for all patients and the mean hemangioma volume was  $14125.35\text{mm}^3$  for the propranolol group and  $9349.54\text{mm}^3$  for the steroid group. Although the mean

© 2017 American Medical Association. All rights reserved.

volume for the steroid group was smaller, there was no significant difference ( $P=0.33$ ). An image of the lesion region was taken for all groups and the mean area for the propranolol group was  $1318.06\text{mm}^2$  while the mean area for the steroid group was  $1093.51\text{mm}^2$ . As with the volume, there was no statistically significant difference between the two groups ( $P=1.00$ ). In addition, most of the lesions were red in color. One patient from each group had an ulceration and two patients from the propranolol showed re-epithelization.

After hearing each patient's medical history, 2 people of propranolol group and 4 people of steroid group had hemangioma when they were born. None of propranolol group and 3 people of steroid group have herald sign. It was found that the mean age when hemangioma began was 0.68 months for the propranolol group and 0.50 months for the steroid group ( $P=0.53$ ). The mean period when hemangioma grew the most was 3.12 months for the propranolol group and 2.53 for the steroid group ( $P=3.91$ ). 3 people (mother in propranolol group, 2 cousins in steroid group) have family history of hemangioma. Furthermore, there was no statistically significant variable between two groups.

During the duration of the trial, 60 people (100%) in the propranolol group and 4 people (44.44%) in the steroid group took a concomitant drug. In the propranolol group, there were 112 cases of concomitant drug consumption by 13 people, and in the steroid group, there were 107 cases by 14 people.

In the propranolol group, the most commonly consumed concomitant drug was Hydrocortisone (D07AA02) (8 cases, 5 people), N02BE01(Acetaminophen) (8 cases, 6 people), and A07FA01(Bacillus licheniformis, Ramnos Granule, Medilac-S Powder) (6 cases, 6 people). In the steroid group, the most commonly consumed concomitant drug was R01BA53 (Comy Syrup, Coben Syrup, Colmin-A Syrup) (10 cases/4 people) and A07FA01 (Bacillus licheniformis, Ramnos Granule, Medilac-S Powder) (6 cases, 5 people).



## **6.1. Efficacy Evaluation**

### **6.1.1. Primary Efficacy Evaluation**

In our analysis, all missing values in the ITT group and ITT group applying multiple imputation were replaced with “Reaction” or “Non-reaction” and categorized into two groups: ITT group and PP group. The final research results were results from the ITT analysis group applying MI. Multiple imputation was used to predict the Reaction/Non-reaction of the secondary efficacy variables size (area), proliferative stop time point, regression time point, color, ulceration size, and presence of re-epithelization.

For the ITT analysis group applying MI, the treatment response rate in the propranolol group was 95.65% and that of the steroid group was 91.94%. The difference in response rates between the two groups was 3.71%, and the 95% confidence interval was [-15.43, 22.84]. Because the lower limit of the confidence interval (-15.43%) was greater than -20%, it can be said that propranolol is non-inferior.

As a result of the analysis of supplementary validation results for four subjects with missing values (which were replaced with “Non-reaction”), the treatment response rate in the propranolol group was 94.12% and that of the steroid group was 82.35%. The Fisher’s Exact test result was that the treatment response rates between the two groups could not be said to be different. The difference in response rates between the two groups was 11.76%, and the 95% confidence interval was [-9.53, 33.06]. Because the lower limit of the confidence interval (-9.53%) was greater than -20%, it can be said that is non-inferior.

Another analysis of supplementary validation results for four subjects with missing values (also replaced with “Reaction”) revealed the same results (non-inferior). Since the lower limit of the 95% confidence interval (-18.65, 18.65) is greater than -20%, it is non-inferior.

In the case of the PP group, the 4 participants with missing values were excluded and the difference in response rate between the two groups was found to be 0%. The 95% confidence interval was [-20.59, 23.16] and because the lower limit is smaller than -20%, we cannot say that it is non-inferior.

### 6.1.2. Secondary Efficacy Evaluation

The volume reduction changes (%) were 55.87% and 46.52% in the propranolol group and steroid group, respectively. The rate of changes in propranolol was higher, but there was no significant statistically differences ( $P=0.27$ ).

The average size of hemangioma decreased over time, regardless of the group. In addition, the interaction (Group \* Time Point) was not significant, thus it cannot be said that there is a difference between the two groups in the change in hemangioma size. However, although controlling for time did not result in a statistically significant difference, controlling for group did.

After checking the frequency and percentage of color by group and time, we found that most hemangioma were either red or blue in color. In the case where the color was apricot, the color was gone by the 7<sup>th</sup> visit. Results from generalized estimating equation (GEE) showed that group, time, group\*time effects were all nonsignificant.

There were 8 cases of re-epithelization in the propranolol group and 4 cases in the steroid group during the entire research period. Out of the 34 participants, re-epithelization occurred for 2 people (both in the propranolol group) during Visit 1 (screening). For Visits 1 (screening) and 2 (week 1), re-epithelization only occurred for participants in the propranolol group. Re-epithelization cases were observed in both groups for Visit 3 (Week 4), Visit 4 (Week 8), and Visit 5 (Week 12). In Visit 6 (Week 16), only the steroid group saw a case of re-epithelization. No cases of re-epithelization were observed in Visit 7 (Week 20). Furthermore, results of logistic regression show that group, time point, group \* time point effects were all nonsignificant.

During the entire duration of the clinical trial, there was one case of ulceration in the propranolol group and 2 cases in the steroid group. In Visit 1 (screening), ulceration was found in 2 out of 34 people, one per group. In Visit 2 (Week 1), there was one case from the steroid group. From Visit 3 (Week 3), no ulceration cases were observed. The ulceration found in 2 people during Visit 1 (screening) was 37.7mm<sup>2</sup> (propranolol group) and 38.5mm<sup>2</sup> (steroid group), and the ulceration found in Visit 2 (Week 1) was 22mm<sup>2</sup> from the steroid group. If no ulceration was found, the size was recorded as "0". From Visit 3 (Week 2), the descriptive statistics quantity was all "0". Results from logistic regression showed that group, time point, group\*time point effects were all nonsignificant. Moreover, using generalized estimating equation (GEE) also resulted in nonsignificant group, time point, and group\*time point effects.

In the case of the propranolol group, in all 17 subjects proliferation stopped or a regression occurred.

The median time it took to reach proliferative stop or regression was 12 days after random assignment. For the steroid group, 15 subjects out of 17 showed proliferative stop or regression, and the median time was 11 days after random assignment. Results from a log rank test showed that there was no difference between the two groups.

When considering regression to be a decrease of at least 25% compared to Visit 1, 13 out of 17 subjects in the propranolol group experienced regression and the median time was 62 days after random assignment. For the steroid group, regression occurred for 9 out of 17 subjects and the median time was 120 days. Conducting a log rank test resulted in no difference between the two groups.

In terms of medication administration, in Visit 2 (Week 1) all subjects from both groups were administered medication, but in Visit 3 (Week 4) four subjects from the propranolol group and one from the steroid group did not take medication. For the remaining visits, there was a subject who did not take medication. Furthermore, excluding Visit 2 (Week 1), for each visit the number of subjects who took medication was higher for the steroid group than the propranolol group. When time point was controlled for, there was no statistically significant difference at the 5% level between the two groups in terms of medical administration (P-value=0.0566). In addition, there was also no difference in terms of total medication duration and outpatient visits (P-value=0.4375, 0.1633).

## 6.2. Safety Evaluation

In the steroid group, after random assignment there was one patient (S025) who did not have at least one safety assessment completed. Safety analysis was conducted for the remaining 33 patients (safety population).

Results from observing complications after drug for both groups showed that the frequency for hypertension was highest for most visits. Other complications in steroid group (n=5) were statistically significantly more than in the propranolol group (n=0) in Visit 2 (week 1) (P= 0.01). The facial edema in steroid group (n=5) was statistically significantly more than in the propranolol group (n=0) in Visit 4 (week 8) (P= 0.01). The number of cases for all complications in the steroid group (n=10) was statistically significant higher than that of the propranolol group (n=5) in Visit 6 (week 16) (P=0.04).

The number of patients who had at least one adverse reaction was 31 (16 from propranolol group, 15 from steroid group) out of a total of 33. In the experimental group there was 70 cases across 16 patients and in the control group there was 60 cases across 15 patients (P=1.00). No serious adverse reaction occurred. The adverse reactions that occurred mostly had little to no relevance to the drug administered, and most have recovered. The most common adverse reaction for both the propranolol group and the steroid group was nasopharyngitis, which occurred in 13 patients (21 cases) in the propranolol group and in 8 patients (14 cases) in the steroid group. In terms of number of patients, the dermatitis atopic (total 10 patients, 7 in propranolol and 3 in steroid) and diarrhea (total 10 patients, 6 in propranolol and 4 in steroid) were the next most common adverse reactions.

## 7. References

1. Sasaki GH, Pang CY, Wittliff JL. Pathogenesis and treatment of infant skin strawberry hemangiomas: clinical and in vitro studies of hormonal effects. *Plast Reconstr Surg.* 1984;73:359-70.
2. Enjolras O, Riche MC, Merland JJ, Escande JP. Management of alarming hemangiomas in infancy: a review of 25 cases. *Pediatrics* 1990;85:491-8.
3. Bennett ML, Fleischer AB Jr, Chamlin SL, Frieden IJ. Oral corticosteroid use is effective for cutaneous hemangiomas: an evidence-based evaluation. *Arch Dermatol* 2001;137:1208-13.
4. Price CJ, Lattouf C, Baum B, et al. Propranolol vs corticosteroids for infantile hemangiomas: a multicenter retrospective analysis. *Arch Dermatol* 2001;147:1371-6.
5. Zarem HA, Edgerton MT. Induced resolution of cavernous hemangiomas following prednisolone therapy. *Plast Reconstr Surg* 1967;39:76-83.
6. George ME, Sharma V, Jacobson J, Simon S, Nopper AJ. Adverse effects of systemic glucocorticosteroid therapy in infants with hemangiomas. *Arch Dermatol* 2004;140: 963-9.
7. Bagazgoitia L, Torrelo A, Gutierrez JC, et al. Propranolol for infantile hemangiomas. *Pediatr Dermatol* 2011;28:108-14.
8. Artman M, Grayson M, Boerth RC. Propranolol in children: safety-toxicity. *Pediatrics* 1982;70:30-1.
9. Love JN, Sikka N. Are 1-2 tablets dangerous? Beta-blocker exposure in toddlers. *J Emerg Med* 2004;26:309-14.
10. Love JN, Howell JM, Klein-Schwartz W, Litovitz TL. Lack of toxicity from pediatric beta-blocker exposures. *Hum Exp Toxicol* 2006;25:341-6.
11. Storch CH, Hoeger PH. Propranolol for infantile haemangiomas - insights into the molecular mechanisms of action. *Br J Dermatol* 2010;163:269-74.
12. Bohdana Ratitch, Ilya Lipkovich, Michael O'Kelly. Combining Analysis Results from Multiply Imputed Categorical Data. *PharmaSUG 2013 - Paper SP03*
13. David Firth. Bias reduction of maximum likelihood estimates. *Biometrika* 1993;80:27-38.
